1  
2  
3 **Presynaptic NMDA receptors facilitate short-term plasticity and BDNF release at**  
4 **hippocampal mossy fiber synapses**

5  
6 Pablo J. Lituma<sup>1</sup>, Hyung-Bae Kwon<sup>1,4</sup>, Rafael Lujan<sup>3</sup>, Pablo E. Castillo<sup>1,2\*</sup>

7  
8 <sup>1</sup> Dominick P. Purpura Department of Neuroscience, Albert Einstein College of Medicine, Bronx,  
9 NY 10461, U.S.A.

10 <sup>2</sup> Department of Psychiatry and Behavioral Sciences, Albert Einstein College of Medicine,  
11 Bronx, NY 10461, U.S.A.

12 <sup>3</sup> Instituto de Investigación en Discapacidades Neurológicas (IDINE), Facultad de Medicina,  
13 Universidad Castilla-La Mancha, 02008 Albacete, Spain.

14 <sup>4</sup> Present address: The Solomon H. Snyder Department of Neuroscience, John Hopkins  
15 University, School of Medicine, Baltimore, MD 21205

16  
17  
18  
19  
20  
21  
22 Running title: Role of presynaptic NMDA receptors in short-term plasticity

23  
24 Keywords: CA3, ionotropic, hippocampus, presynaptic calcium, autoreceptors

25  
26 \* To whom correspondence should be addressed:

27  
28 Pablo E. Castillo, MD/PhD  
29 Dominick P. Purpura Department of Neuroscience  
30 Albert Einstein College of Medicine  
31 1410 Pelham Parkway South  
32 Kennedy Center, Room 703  
33 Bronx, NY 10461, USA  
34 Email: [pablo.castillo@einsteinmed.org](mailto:pablo.castillo@einsteinmed.org)

35  
36  
37 Title: 99 characters (with spaces)

38 Abstract: 139 words, 1081 characters with spaces

39 Main text (excluding Summary, Methods, references and figure legends): 4,369

40 Figures: 8

41 Supplemental figures: 6

42  
43  
44

45

46

47  
48  
49  
50  
51  
52  
53  
54  
55  
56  
57  
58  
59  
60  
61  
62  
63  
64  
65  
66  
67  
68  
69

**Abstract**

Neurotransmitter release is a highly controlled process by which synapses can critically regulate information transfer within neural circuits. While presynaptic receptors –typically activated by neurotransmitters and modulated by neuromodulators– provide a powerful way of fine tuning synaptic function, their contribution to activity-dependent changes in transmitter release remains poorly understood. Here, we report that presynaptic NMDA receptors (preNMDARs) at hippocampal mossy fiber boutons can be activated by physiologically relevant patterns of activity and selectively enhance short-term synaptic plasticity at mossy fiber inputs onto CA3 pyramidal cells and mossy cells, but not onto inhibitory interneurons. Moreover, preNMDARs facilitate brain-derived neurotrophic factor (BDNF) release and contribute to presynaptic calcium rise. Taken together, our results indicate that preNMDARs, by increasing presynaptic calcium, fine tune mossy fiber neurotransmission and can control information transfer during dentate granule cell burst activity that normally occur *in vivo*.

70  
71  
72  
73

## Introduction

74 Neurotransmission is a dynamic and highly regulated process. The activation of ionotropic and  
75 metabotropic presynaptic receptors provides a powerful way of fine tuning neurotransmission via  
76 the facilitation or inhibition of neurotransmitter release (Burke & Bender, 2019; Engelman &  
77 MacDermott, 2004; Miller, 1998; Pinheiro & Mulle, 2008; Schicker, Dorostkar, & Boehm, 2008).  
78 Due to their unique functional properties, including high calcium-permeability, slow kinetics and  
79 well-characterized role as coincidence-detectors (Cull-Candy, Brickley, & Farrant, 2001; Lau &  
80 Zukin, 2007; Paoletti, Bellone, & Zhou, 2013; Traynelis et al., 2010), presynaptic NMDA receptors  
81 (preNMDARs) have emerged as key regulators of synaptic transmission and plasticity (Banerjee,  
82 Larsen, Philpot, & Paulsen, 2016; Bouvier, Bidoret, Casado, & Paoletti, 2015; Bouvier, Larsen,  
83 Rodriguez-Moreno, Paulsen, & Sjostrom, 2018; Duguid, 2013; Duguid & Smart, 2009; Wong,  
84 Rannio, Jones, Thomazeau, & Sjostrom, 2020). Regulation of neurotransmitter release by NMDA  
85 autoreceptors in the brain was suggested three decades ago (Martin, Bustos, Bowe, Bray, &  
86 Nadler, 1991). Anatomical evidence for preNMDARs arose from an immuno-electron microscopy  
87 study revealing NMDARs at the mossy fiber giant bouton of the monkey hippocampus (Siegel et  
88 al., 1994), followed by functional studies in the entorhinal cortex indicating that preNMDARs  
89 tonically increase spontaneous glutamate release and also facilitate evoked release in a  
90 frequency-dependent manner (Berretta & Jones, 1996; Woodhall, Evans, Cunningham, & Jones,  
91 2001). Since these early studies, although evidence for preNMDARs has accumulated throughout  
92 the brain (Banerjee et al., 2016; Bouvier et al., 2018; Duguid & Smart, 2009), the presence and  
93 functional relevance of preNMDARs at key synapses in the brain have been called into question  
94 (Carter & Jahr, 2016; Duguid, 2013).

95

96 Mossy fibers – the axons of dentate granule cells (GCs) – establish excitatory synapses onto

97 proximal dendrites of CA3 pyramidal neurons, thereby conveying a major excitatory input to the  
98 hippocampus proper (Amaral, Scharfman, & Lavenex, 2007; Henze, Urban, & Barrionuevo,  
99 2000). This synapse displays uniquely robust frequency facilitation both *in vitro* (Nicoll & Schmitz,  
100 2005; Salin, Scanziani, Malenka, & Nicoll, 1996; Vyleta, Borges-Merjane, & Jonas, 2016) and *in*  
101 *vivo* (Hagena & Manahan-Vaughan, 2010; Vandael, Borges-Merjane, Zhang, & Jonas, 2020). The  
102 molecular basis of this short-term plasticity is not fully understood but likely relies on diverse  
103 presynaptic mechanisms that increase glutamate release (Jackman & Regehr, 2017; Rebola,  
104 Carta, & Mulle, 2017). Short-term, use-dependent facilitation is believed to play a critical role in  
105 information transfer, circuit dynamics and short-term memory (Abbott & Regehr, 2004; Jackman  
106 & Regehr, 2017; Klug et al., 2012). The mf-CA3 synapse can strongly drive the CA3 network  
107 during short bursts of presynaptic activity (Chamberland, Timofeeva, Evstratova, Volynski, & Toth,  
108 2018; Henze, Wittner, & Buzsaki, 2002; Vyleta et al., 2016; Zucca et al., 2017), an effect that likely  
109 results from two key properties of this synapse, namely, its strong frequency facilitation and  
110 proximal dendritic localization. In addition to CA3 pyramidal neurons, mossy fiber axons establish  
111 synaptic connections with hilar mossy cells (MC) and inhibitory interneurons (IN) (Amaral et al.,  
112 2007; Henze et al., 2000). These connections also display robust short-term plasticity (Lysetskiy,  
113 Foldy, & Soltesz, 2005; Toth, Soares, Lawrence, Philips-Tansey, & McBain, 2000), which may  
114 contribute significantly to information transfer and dynamic modulation of the dentate gyrus (DG)-  
115 CA3 circuit (Bischofberger, Engel, Frotscher, & Jonas, 2006; Evstratova & Toth, 2014; Lawrence  
116 & McBain, 2003). Despite early evidence for preNMDARs at mossy fiber boutons (Siegel et al.,  
117 1994), whether these receptors modulate neurotransmission at mossy fiber synapses is unknown.  
118 Intriguingly, mossy fibers contain one of the highest expression levels of brain-derived  
119 neurotrophic factor, BDNF (Conner, Lauterborn, Yan, Gall, & Varon, 1997). While preNMDARs  
120 were implicated in BDNF release at corticostriatal synapses (Park, Popescu, & Poo, 2014),  
121 whether putative preNMDARs impact BDNF release at mossy fiber synapses remains  
122 unexplored.

123

124 Here, to examine the potential presence and impact of preNMDARs at mossy fiber synapses, we  
125 utilized multiple approaches, including immunoelectron microscopy, selective pharmacology for  
126 NMDARs, a genetic knockout strategy to remove NMDARs from presynaptic GCs, two-photon  
127 imaging of BDNF release, and presynaptic calcium signals in acute rodent hippocampal slices.  
128 Our findings indicate that preNMDARs, likely by increasing presynaptic calcium, contribute to  
129 mossy fiber short-term plasticity and promotes BDNF release. Thus, preNMDARs at mossy fibers  
130 may facilitate information transfer and provide an important point of regulation in the DG – CA3  
131 circuit by fine-tuning both glutamate and BDNF release.

132

## 133 **Results**

134

### 135 **Electron microscopy reveals presynaptic NMDA receptors at mossy fiber terminals**

136 To determine the potential localization of NMDA receptors at the mossy fiber terminals of the  
137 rodent hippocampus, we performed electron microscopy and post-embedding immunogold  
138 labeling in rats using a validated antibody for the obligatory subunit GluN1 (Petralia, Yokotani, &  
139 Wenthold, 1994; Siegel et al., 1994; Takumi, Ramirez-Leon, Laake, Rinvik, & Ottersen, 1999;  
140 Watanabe et al., 1998). Gold particles were detected in the main body of the postsynaptic density  
141 as well as presynaptic mossy fiber terminals (**Figure 1A-C**). GluN1 localized in mossy fiber  
142 boutons in a relatively high proportion to the active zone, as compared to associational-  
143 commissural (ac) synapse in the same CA3 pyramidal neuron (**Figure 1D**; mf, ~32% presynaptic  
144 particles; ac, <10% presynaptic particles; n = 3 animals). Similar quantification for AMPA receptors  
145 did not reveal presynaptic localization of these receptors in either mossy fiber or associational  
146 commissural synapses (**Figure S1A-C**; ~5% presynaptic particles, n = 3 animals). Together,  
147 these results provide anatomical evidence for preNMDARs at mf-CA3 synapses.

148

149 **Both NMDAR antagonism and genetic deletion from presynaptic granule cells reduce**  
150 **mossy fiber low-frequency facilitation**

151 Presynaptic short-term plasticity, in the form of low-frequency (~1 Hz) facilitation (LFF), is uniquely  
152 robust at the mf-CA3 synapse (Nicoll & Schmitz, 2005; Salin et al., 1996). To test a potential  
153 involvement of preNMDARs in LFF, we monitored CA3 pyramidal neurons in acute rat  
154 hippocampal slices. Neurons were held at  $V_h = -70$  mV to minimize postsynaptic NMDAR  
155 conductance, and mossy fibers were focally stimulated with a bipolar electrode (theta glass  
156 pipette) in *stratum lucidum* ~100  $\mu$ m from the recorded cell. LFF of AMPAR-mediated  
157 transmission was induced by stepping the stimulation frequency from 0.1 Hz to 1 Hz for ~2 min  
158 in the presence of picrotoxin (100  $\mu$ M) to block fast inhibitory synaptic transmission, and a low  
159 concentration of the AMPAR noncompetitive antagonist LY303070 (0.5  $\mu$ M) to minimize CA3-CA3  
160 recurrent activity (Kwon & Castillo, 2008). Bath-application of the NMDAR irreversible open  
161 channel blocker MK-801 (50  $\mu$ M) significantly reduced LFF (**Figure 1E**). In addition, the  
162 competitive NMDAR antagonists D-APV (100  $\mu$ M) or R-CPP (50  $\mu$ M) yielded a comparable  
163 reduction of facilitation (**Figure 1F**). To confirm that these synaptic responses were mediated by  
164 mossy fibers, the mGluR2/3 agonist DCG-IV (1  $\mu$ M) was applied at the end of all recordings  
165 (Kamiya, Shinozaki, & Yamamoto, 1996). To control for stability, we performed interleaved  
166 experiments in the absence of NMDAR antagonists and found that LFF remained unchanged  
167 (**Figure S2A**). These findings indicate NMDAR antagonism reduces mf-CA3 short-term plasticity  
168 (LFF), suggesting that preNMDARs could contribute to this form of presynaptic plasticity.

169  
170 The reduction in facilitation of AMPAR-transmission could be due to dampening of CA3 recurrent  
171 activity by NMDAR antagonism (Henze et al., 2000; Kwon & Castillo, 2008; Nicoll & Schmitz,  
172 2005). To discard this possibility, we repeated our experiments in a much less excitable network  
173 in which AMPAR-mediated synaptic transmission was selectively blocked by a high concentration  
174 of the noncompetitive antagonist LY303070 (15  $\mu$ M), and monitored the kainate receptor (KAR)-

175 mediated component of mossy fiber synaptic transmission (Castillo, Malenka, & Nicoll, 1997;  
176 Kwon & Castillo, 2008). In addition, 2 mM MK-801 was included in the intracellular recording  
177 solution to block postsynaptic NMDARs (Corlew, Brasier, Feldman, & Philpot, 2008) (**Figure**  
178 **S3A**). To further ensure postsynaptic NMDAR blockade, we voltage-clamped the CA3 pyramidal  
179 neuron at -70 mV and waited until NMDAR-mediated transmission was eliminated and only KAR-  
180 EPSCs remained. Under these recording conditions, bath-application of MK-801 (50  $\mu$ M) also  
181 reduced LFF of KAR-mediated transmission (**Figure 1G**), whereas LFF remained unchanged in  
182 interleaved control experiments (**Figure S2B**). At the end of these recordings, 10  $\mu$ M NBQX was  
183 applied to confirm KAR-transmission (**Figure 1G; Figure S2B**) (Castillo et al., 1997; Kwon &  
184 Castillo, 2008). It is therefore unlikely that the reduction of LFF mediated by NMDAR antagonism  
185 could be explained by recurrent network activity, suggesting a direct effect on transmitter release.

186  
187 To further support a role of preNMDARs in mossy fiber LFF, we took a genetic approach by  
188 conditionally removing NMDARs from GCs in *Grin1* floxed mice. To this end, an AAV5-CamKII-  
189 Cre-GFP virus was bilaterally injected in the DG to selectively delete *Grin1* expression, whereas  
190 AAV5-CamKII-eGFP was injected in littermates as a control (**Figure 2A**). Two weeks after surgery,  
191 we prepared acute hippocampal slices and examined the efficacy of *Grin1* deletion by analyzing  
192 NMDAR-mediated transmission in GFP<sup>+</sup> GCs of *Grin1*-cKO and control mice. We confirmed that  
193 in contrast to control mice, no NMDAR-EPSCs were elicited by electrically stimulating medial  
194 perforant path inputs in *Grin1*-cKO GCs voltage-clamped at +40 mV in the presence of 100  $\mu$ M  
195 picrotoxin and 10  $\mu$ M NBQX (**Figure 2B**). As expected, the NMDAR/AMPA ratio was  
196 significantly reduced in *Grin1*-cKO mice compared to control (**Figure 2C**). Only acute slices that  
197 exhibited robust GFP fluorescence in the DG were tested for LFF of AMPAR-transmission in CA3.  
198 We found that LFF was significantly reduced in *Grin1*-cKOs as compared to controls (**Figure 2D**),  
199 indicating that genetic removal of NMDARs from GCs recapitulated NMDAR antagonism (**Figure**  
200 **1E-G**). *Grin1* deletion did not affect basal transmitter release as indicated by the lack of change

201 in paired-pulse ratio (Control:  $2.5 \pm 0.36$ ,  $n = 13$  cells; *Grin1* cKO:  $2.4 \pm 0.31$ ,  $n = 13$  cells;  $U =$   
202  $0.758$ , Mann-Whitney test). Collectively, our findings using two distinct approaches strongly  
203 suggest that NMDAR activation in GCs increases LFF of mf-CA3 synaptic transmission.

204

### 205 **Reduced facilitation by NMDAR antagonism is independent of the granule cell** 206 **somatodendritic compartment**

207 Bath application of MK-801 could have blocked dendritic NMDARs in GCs and potentially affected  
208 transmitter release (Christie & Jahr, 2008; Duguid, 2013). To address this possibility, we repeated  
209 our experiments after performing a surgical cut in the granular layer of the DG in order to isolate  
210 mossy fiber axons from GCs (**Figure S4A**). Under these conditions, MK-801 bath application still  
211 reduced LFF (**Figure 3A**), and LFF was stable in control, acutely transected axons (**Figure 3B**).  
212 In addition, puffing D-APV (2 mM) in *stratum lucidum* near ( $\sim 200 \mu\text{m}$ ) the recorded neuron also  
213 reduced LFF (**Figure 3C**), whereas puffing ACSF had no effect (**Figure 3D**). Lastly, in a set of  
214 control experiments we confirmed that D-APV puffs were sufficient to transiently block NMDAR-  
215 mediated transmission in CA3 but not in DG (**Figure S4B,C**). Together, these results support the  
216 notion that LFF reduction was due to the blockade of preNMDARs but not somatodendritic  
217 NMDARs on GCs.

218

### 219 **PreNMDARs impact burst-induced facilitation and information transfer**

220 GCs *in vivo* typically fire in brief bursts (Diamantaki, Frey, Berens, Preston-Ferrer, & Burgalossi,  
221 2016; GoodSmith et al., 2017; Henze et al., 2002; Pernia-Andrade & Jonas, 2014; Senzai &  
222 Buzsaki, 2017). To test whether preNMDARs contribute to synaptic facilitation that occurs during  
223 more physiological patterns of activity, mossy fibers were activated with brief bursts (5 stimuli, 25  
224 Hz). We first took an optogenetic approach and used a Cre-dependent ChiEF virus to selectively  
225 light-activate mf-CA3 synapses in *Grin1*-cKO and control mice. Thus, animals were injected with  
226 a mix of AAV5-CamKII-CreGFP + AAV-DJ-FLEX-ChiEF-tdTomato viruses in the DG (**Figure 4A**).



227 At least four weeks after surgery, acute slices were prepared and burst-induced facilitation of  
228 AMPAR-mediated transmission in CA3 was assessed (**Figure 4B,C**). Burst-induced facilitation  
229 triggered by light activation and measured as the ratio of EPSCs elicited by the 5<sup>th</sup> and 1<sup>st</sup> pulse  
230 (P5/P1 ratio), was significantly reduced in *Grin1*-cKO animals as compared to controls. Because  
231 these bursts of activity can activate the CA3 network (Henze et al., 2000; Kwon & Castillo, 2008;  
232 Nicoll & Schmitz, 2005), we next monitored KAR-EPSCs under conditions of low excitability (as  
233 in Figure 1G). MK-801 bath application also reduced burst-induced facilitation, whereas facilitation  
234 remained unchanged in naïve slices (**Figure 4D,E**). Lastly, we tested whether preNMDARs, by  
235 facilitating glutamate release during bursting activity, could bring CA3 pyramidal neurons to  
236 threshold and trigger postsynaptic action potentials. To test this possibility, we monitored action  
237 potentials elicited by KAR-EPSPs (resting membrane potential  $-70 \pm 2$  mV) from CA3 pyramidal  
238 neurons intracellularly loaded with 2 mM MK-801. Under these recording conditions, MK-801 bath  
239 application significantly reduced the mean number of spikes per burst (**Figure 4F**). No changes  
240 in mean spikes per burst were observed in naïve slices over time (**Figure 4G**). Application of 10  
241  $\mu$ M NBQX at the end of these experiments confirmed that action potentials were induced by KAR-  
242 mediated synaptic responses. In control experiments we found that intracellular MK-801  
243 effectively blocked postsynaptic NMDAR transmission during burst stimulation (**Figure S3B**).  
244 Altogether, these results indicate that preNMDARs at mf-CA3 synapses can contribute to  
245 information transfer from the DG to CA3.

246

247

#### 248 **PreNMDARs contribute to presynaptic calcium rise and can be activated by glutamate**

249 PreNMDARs could facilitate glutamate and BDNF release by increasing presynaptic Ca<sup>2+</sup> rise  
250 (Bouvier et al., 2016; Buchanan et al., 2012; Carter & Jahr, 2016; Corlew et al., 2008; Park et al.,  
251 2014). To test this possibility at mf-CA3 synapses we combined a conditional knockout strategy  
252 with calcium imaging using two-photon microscopy. We deleted preNMDARs by injecting AAV5-

253 CamKII-mCherry-Cre virus in the DG of *Grin1* floxed mice, and littermate animals injected with  
254 AAV5-CamKII-mCherry virus served as control (**Figure 5A**). Two weeks after surgery, we  
255 confirmed the efficacy of *Grin1* deletion by activating medial perforant path inputs and monitoring  
256 NMDAR/AMPA ratios in GCs of control and *Grin1*-cKO animals (**Figure 5A**). Virtually no  
257 NMDAR-EPSCs were detected at  $V_h = +40$  mV in *Grin1*-cKO animals (**Figure 5A**). Acute slices  
258 that exhibited robust mCherry fluorescence in the DG were taken for calcium imaging  
259 experiments. To maximize our ability to detect preNMDAR-mediated calcium signals, we used a  
260 recording solution that contained nominal  $Mg^{2+}$ , 4 mM  $Ca^{2+}$  and 10  $\mu$ M D-Serine (Carter & Jahr,  
261 2016). GCs expressing mCherry were patch-loaded with 35  $\mu$ M Alexa 594 and 200  $\mu$ M Fluo-5F,  
262 and mossy fiber axons were imaged and followed towards CA3 until giant boutons (white arrows)  
263 were identified (**Figure 5B**). We found that calcium transients (CaTs) elicited by direct current  
264 injection in the GC soma (5 action potentials, 25 Hz) were significantly smaller in *Grin1*-cKO  
265 animals as compared to control (**Figure 5C-E**). Thus, preNMDARs contribute significantly to  
266 presynaptic  $Ca^{2+}$  rise in mossy fiber boutons, and by this means facilitate synaptic transmission.  
267  
268 Lastly, we sought to determine if direct activation of preNMDARs could drive  $Ca^{2+}$  influx in mossy  
269 fiber giant boutons. To test this possibility, we elicited CaTs by two-photon uncaging (2PU) of  
270 glutamate on mossy fiber boutons of control and *Grin1*-cKO animals (**Figure 6A**). As previously  
271 described mCherry GCs were patch-loaded with Alexa 594 and Fluo-5F in a recording solution  
272 designed to maximize the detection of preNMDAR-mediated calcium signals (as in Figure 5). We  
273 first verified that glutamate 2PU-induced CaTs in dendritic spine heads of GCs were strongly  
274 reduced in *Grin1*-cKO animals as compared to controls (**Figure 6B,C**). To verify that reduced  
275  $\Delta G/R$  signals were a result of *Grin1* deletion and not differences in uncaging laser power, we  
276 performed a laser power intensity–response curve, and found that *Grin1*-cKO animals exhibited  
277 reduced  $\Delta G/R$  signals as compared to control regardless of laser power intensity (**Figure S5**).  
278 We next measured glutamate 2PU-induced CaTs in mossy fiber giant boutons (identified as in

279 Figure 5B) and found that single uncaging pulses were insufficient to drive detectable CaTs in  
280 control boutons (**Figure S6**). However, a burst of 2PU stimulation (5 pulses, 25 Hz) induced CaTs  
281 in mossy fiber boutons of control but not in *Grin1*-cKO animals (**Figure 6D,E**). These findings  
282 indicate that brief bursts of glutamate 2PU, a manipulation that mimics endogenous release of  
283 glutamate during physiological patterns of activity, induces presynaptic Ca<sup>2+</sup> influx in mossy fiber  
284 boutons by activating preNMDARs.

285

### 286 **PreNMDARs promote BDNF release from mossy fiber boutons**

287 Previous work implicated preNMDARs in the release of BDNF at corticostriatal synapses following  
288 repetitive activity and presynaptic calcium elevations (Park et al., 2014). Given the uniquely high  
289 expression levels of BDNF in mossy fibers (Conner et al., 1997; Yan et al., 1997), we examined  
290 the potential role for preNMDARs in BDNF release from mossy fiber terminals. To this end, a Cre-  
291 dependent BDNF reporter (BDNF-pHluorin) was injected in *Grin1*-floxed and control animals.  
292 Littermate mice were injected with a mix of AAV5-CamKII-mCherry-Cre + AAV-DJ-DIO-BDNF-  
293 pHluorin viruses in the DG (**Figure 7A**). At least four weeks after surgery, acute slices were  
294 prepared for two-photon microscopy to image mossy fiber boutons. After acquiring a stable  
295 baseline of BDNF-pHluorin signals, mossy fibers were repetitively activated (see Methods)  
296 (**Figure 7B**). BDNF-pHluorin signals were analyzed by measuring  $\Delta F/F$ , where  $\Delta F/F$  reductions  
297 indicate BDNF release (Park et al., 2014). We found that *GluN1*-deficient mossy fiber boutons  
298 showed a significant (~50%) reduction of BDNF release as compared to control (**Figure 7C-D**),  
299 suggesting preNMDARs contribute significantly to BDNF release during repetitive activity of  
300 mossy fiber synapses.

301

### 302 **PreNMDAR-mediated regulation of mossy fiber synapses is input-specific**

303 In addition to providing a major excitatory input to the hippocampus proper, mossy fiber axons  
304 also synapse onto excitatory hilar mossy cells and inhibitory neurons in CA3 (Amaral et al., 2007;

305 Henze et al., 2000; Lawrence & McBain, 2003). To test whether preNMDARs could also play a  
306 role at these synapses, we visually patched mossy cells and interneurons, loaded them with 35  
307  $\mu\text{M}$  Alexa 594 (**Figure 8A**) and 2 mM MK-801, and monitored AMPAR-EPSCs ( $V_h = -70$  mV).  
308 Unlike mf-CA3 synapses, mossy fiber synapses onto CA3 interneurons in *stratum lucidum* do not  
309 express LFF, but can undergo burst-induced facilitation or depression (Toth et al., 2000). We found  
310 that MK-801 bath application had no significant effect on burst-induced facilitation or depression  
311 (**Figure 8B**), suggesting preNMDARs do not play a role at mf-Interneuron synapses in CA3.  
312 Mossy fiber inputs onto hilar mossy cells undergo robust activity-dependent facilitation (Lysetskiy  
313 et al., 2005). Like for mf-CA3 synapses, we found that MK-801 reduced LFF (**Figure 8C**). These  
314 findings strongly suggest that preNMDARs facilitate mossy fiber transmission onto excitatory  
315 neurons but not onto inhibitory interneurons.

316

## 317 **Discussion**

318

319 In this study, we provide evidence that hippocampal mossy fiber boutons express preNMDARs  
320 whose activation fine-tunes mossy fiber synaptic function. Specifically, our results show that  
321 preNMDARs enhance mossy fiber short-term plasticity in a target cell-specific manner. By  
322 enhancing glutamate release onto excitatory but not inhibitory interneurons, preNMDARs  
323 increase GC-CA3 spike transfer. Moreover, using two-photon calcium imaging, we demonstrate  
324 that preNMDARs contribute to presynaptic  $\text{Ca}^{2+}$  rise in mossy fiber boutons. Lastly, upon  
325 repetitive activity preNMDARs promote BDNF release from mossy fiber boutons. Taken together,  
326 our findings indicate that preNMDARs act as autoreceptors to boost both glutamate and BDNF  
327 release at mossy fiber synapses. By regulating information flow in the DG-CA3 circuit,  
328 preNMDARs may play a significant role in learning and memory.

329

330 Early studies using immunoperoxidase electron microscopy revealed NMDARs in presynaptic

331 compartments in multiple brain areas (for a review, see Corlew et al., 2008). Subsequent studies  
332 that used immunogold electron microscopy, a more precise localization method, identified  
333 NMDARs on the presynaptic membrane in a number of brain structures, including neocortex  
334 (Fujisawa & Aoki, 2003; Larsen et al., 2011), hippocampus (Berg, Larsson, Morland, &  
335 Gundersen, 2013; Jourdain et al., 2007; McGuinness et al., 2010), and amygdala (Pickel, Colago,  
336 Mania, Molosh, & Rainnie, 2006). In agreement with these studies, and using a previously  
337 validated antibody (Siegel et al., 1994), we identified prominent presynaptic labeling of the  
338 obligatory subunit GluN1 in mossy fiber boutons (Figure 1A-D). Moreover, we found that these  
339 receptors are close to the active zone and therefore well positioned to modulate neurotransmitter  
340 release.

341  
342 Previous work in the cerebellum and neocortex suggested that somatodendritic potentials  
343 generated by NMDARs could signal to nerve terminals and lead to presynaptic  $Ca^{2+}$  elevations  
344 (Christie & Jahr, 2008, 2009). Thus, changes in neurotransmitter release resulting from NMDAR  
345 antagonism could be due to somatodendritic NMDARs but not necessarily preNMDARs residing  
346 on nerve terminals (Duguid, 2013). However, focal NMDAR antagonism far from the  
347 somatodendritic compartment and in transected axons still reduced short-term plasticity at mossy  
348 fiber synapses (Figure 3), making it extremely unlikely that somatodendritic NMDARs could  
349 explain our results. In further support of functional preNMDARs at mossy fibers, we found that  
350 2PU of glutamate induced  $Ca^{2+}$  rise in control but not in GluN1-deficient boutons. Together, our  
351 findings strongly support the presence of functional preNMDARs facilitating neurotransmission at  
352 mf-CA3 synapses. Remarkably, the somatodendritic compartment of GCs can generate sub-  
353 threshold depolarizations at mossy fiber terminals (a.k.a. excitatory presynaptic potentials) (Alle  
354 & Geiger, 2006). By alleviating the magnesium blockade, these potentials could transiently boost  
355 the functional impact of mossy fiber preNMDARs.

356

357 While the presence of preNMDARs is downregulated during development both in neocortex  
358 (Corlew, Wang, Ghermazien, Erisir, & Philpot, 2007; Larsen et al., 2011) and hippocampus  
359 (Mameli, Carta, Partridge, & Valenzuela, 2005), we were able to detect functional preNMDARs in  
360 young adult rats (P17-P28) and mice (P30-P44), once mossy fiber connections are fully  
361 developed (Amaral & Dent, 1981). Functional preNMDARs have been identified in axonal growth  
362 cones of hippocampal and neocortical neurons, suggesting these receptors are important for  
363 regulating early synapse formation (Gill et al., 2015; Wang, Petralia, Wang, Wenthold, &  
364 Brenowitz, 2011). Because GCs undergo adult neurogenesis, and adult born GCs establish new  
365 connections in the mature brain, preNMDARs could also play an important role in immature mossy  
366 fiber synapses and functional integration of new born GCs into the mature hippocampus (Toni &  
367 Schinder, 2015). Moreover, experience can modulate the expression and composition of  
368 preNMDARs in neocortex (Larsen et al., 2014), a possibility not investigated in our study.

369

370 The glutamate that activates preNMDARs may originate from the presynaptic terminal, the  
371 postsynaptic cell, nearby synapses or neighboring glial cells. Our results indicate that activation  
372 of preNMDARs at mossy fiber synapses requires activity-dependent release of glutamate that  
373 likely arises from mossy fiber boutons, although other sources cannot be discarded, including  
374 astrocytes. At medial entorhinal inputs to GCs, preNMDARs appear to be localized away from the  
375 presynaptic release sites and facing astrocytes, consistent with preNMDAR activation by  
376 gliotransmitters (Jourdain et al., 2007; Savtchouk et al., 2019). In contrast, at mf-CA3 synapses  
377 we found that preNMDARs are adjacent to the release sites suggesting a direct control on  
378 glutamate release from mossy fiber boutons.

379

380 The precise mechanism by which preNMDARs facilitate neurotransmitter release is poorly  
381 understood but it may include  $\text{Ca}^{2+}$  influx through the receptor and depolarization of the  
382 presynaptic terminal with subsequent activation of voltage-gated calcium channels (Banerjee et

383 al., 2016; Corlew et al., 2008). In support of this mechanism is the high  $\text{Ca}^{2+}$  permeability of  
384 NMDARs (Paoletti et al., 2013; Rogers & Dani, 1995). Besides, presynaptic subthreshold  
385 depolarization and subsequent activation of presynaptic voltage-gated calcium channels is a  
386 common mechanism by which presynaptic ionotropic receptors facilitate neurotransmitter release  
387 (Engelman & MacDermott, 2004; Pinheiro & Mulle, 2008). PreNMDARs may also act in a  
388 metabotropic manner (Dore, Aow, & Malinow, 2016) and facilitate transmitter release in a  $\text{Ca}^{2+}$ -  
389 influx-independent manner (Abrahamsson et al., 2017). Our findings demonstrating that the open  
390 channel blocker MK-801 robustly reduced short-term plasticity at mossy fiber synapses support  
391 an ionotropic mechanism that involves calcium influx through preNMDARs. In line with previous  
392 studies that detected presynaptic  $\text{Ca}^{2+}$  rises following local activation of NMDARs (e.g. NMDA or  
393 glutamate uncaging) in visual cortex (Buchanan et al., 2012) and cerebellum (Rossi et al., 2012),  
394 we provide direct evidence that preNMDAR activation either by repetitive activation of mossy  
395 fibers or 2PU of glutamate increases presynaptic  $\text{Ca}^{2+}$  (Figures 5 and 6). Although the calcium  
396 targets remain unidentified, these may include proteins of the release machinery, calcium-  
397 dependent protein kinases and phosphatases, and calcium release from internal stores (Banerjee  
398 et al., 2016). In addition to facilitating evoked neurotransmitter release, preNMDARs can promote  
399 spontaneous neurotransmitter release as indicated by changes in miniature, action potential-  
400 independent activity (e.g. mEPSCs) (for recent reviews, see Banerjee et al., 2016; Kunz, Roberts,  
401 & Philpot, 2013; Wong et al., 2020). A potential role for preNMDARs in spontaneous, action  
402 potential-independent release at mossy fiber synapses cannot be discarded.

403

404 Our results show that activation of preNMDARs by physiologically relevant patterns of presynaptic  
405 activity enhanced mossy fiber transmission and DG-CA3 information transfer (Figure 4). Studies  
406 found NMDAR genetic deletion in GCs resulted in memory deficits (e.g. pattern separation)  
407 (McHugh et al., 2007). Although the mechanism is unclear, it could involve activity-dependent  
408 preNMDAR regulation of mossy fiber excitatory connections. We found that preNMDARs facilitate

409 neurotransmitter release in a target cell-specific manner. Like in neocortex (Larsen & Sjostrom,  
410 2015), such specificity strongly suggests that preNMDARs have distinct roles in controlling  
411 information flow in cortical microcircuits. Thus, preNMDAR facilitation of mossy fiber synapses  
412 onto glutamatergic neurons but not GABAergic interneurons (Figure 8) may fine-tune the CA3  
413 circuit by increasing the excitatory/inhibitory balance.

414

415 Given the multiple signaling cascades known to regulate NMDARs (Lau & Zukin, 2007; Sanz-  
416 Clemente, Nicoll, & Roche, 2013), preNMDARs at mossy fiber synapses may provide an  
417 important site of neuromodulatory control. PreNMDARs have been implicated in the induction of  
418 LTP and LTD at excitatory or inhibitory synapses in several brain areas (Banerjee et al., 2016;  
419 Wong et al., 2020). While most evidence, at least using robust induction protocols *in vitro*,  
420 indicates that long-term forms of presynaptic plasticity at mossy fiber synapses can occur in the  
421 absence of NMDAR activation (Castillo, 2012; Nicoll & Schmitz, 2005), our findings do not discard  
422 the possibility that preNMDARs could play a role *in vivo* during subtle presynaptic activities. As  
423 previously reported for corticostriatal LTP (Park et al., 2014), preNMDARs could regulate long-  
424 term synaptic plasticity by controlling BDNF release (Figure 7), which is consistent with BDNF-  
425 TrkB signaling being implicated in mf-CA3 LTP (Schildt, Endres, Lessmann, & Edelman, 2013).  
426 In addition, BDNF could facilitate glutamate release by enhancing preNMDAR function (W. Chen  
427 et al., 2014; Madara & Levine, 2008). By potentiating mf-CA3 transmission, BDNF could also  
428 promote epileptic activity (McNamara & Scharfman, 2012). Lastly, dysregulation of NMDARs is  
429 commonly implicated in the pathophysiology of brain disorders such as schizophrenia, autism,  
430 and epilepsy (Lau & Zukin, 2007; Paoletti et al., 2013). PreNMDAR expression and function have  
431 been suggested to be altered in experimental models of disease, including neuropathic pain (Y.  
432 Chen, Chen, Chen, Zhang, & Pan, 2019; Zeng, Thomson, Aicher, & Terman, 2006), and epilepsy  
433 (Yang, Woodhall, & Jones, 2006). At present, however, *in vivo* evidence for the involvement of  
434 preNMDARs in brain function and disease is rather indirect (Bouvier et al., 2015; Wong et al.,



435 2020). The development of specific preNMDAR tools is required to determine the functional  
436 impact of these receptors *in vivo*.

437

438

## 439 **Methods**

440

### 441 **Antibodies**

442 A monoclonal antibody against GluN1 (clone 54.1 MAB363) was obtained from Millipore  
443 (Germany) and its specificity was characterized previously (Siegel et al., 1994). An affinity-purified  
444 polyclonal rabbit anti-GluA1-4 (pan-AMPA), corresponding to aa 724–781 of rat, was used and  
445 characterised previously (Nusser et al., 1998).

446

### 447 **Immunohistochemistry for electron microscopy**

448 Immunohistochemical reactions at the electron microscopic level were carried out using the post-  
449 embedding immunogold method as described earlier (Lujan, Nusser, Roberts, Shigemoto, &  
450 Somogyi, 1996). Briefly, animals (n = 3 rats were anesthetized by intraperitoneal injection of  
451 ketamine-xylazine 1:1 (0.1 mL/kg b.w.) and transcardially perfused with ice-cold fixative  
452 containing 4% paraformaldehyde, 0.1% glutaraldehyde and 15% saturated picric acid solution in  
453 0.1 M phosphate buffer (PB) for 15 min. Vibratome sections 500 µm thick were placed into 1 M  
454 sucrose solution in 0.1 M PB for 2 h before they were slammed on a Leica EM CPC apparatus.  
455 Samples were dehydrated in methanol at -80°C and embedded by freeze-substitution (Leica EM  
456 AFS2) in Lowicryl HM 20 (Electron Microscopy Science, Hatfield, USA), followed by polymerization  
457 with UV light. Then, ultrathin 80-nm-thick sections from Lowicryl-embedded blocks of the  
458 hippocampus were picked up on coated nickel grids and incubated on drops of a blocking solution  
459 consisting of 2% human serum albumin in 0.05 M TBS and 0.03% Triton X-100. The grids were  
460 incubated with GluN1 or pan-AMPA antibodies (10 µg/mL in 0.05 M TBS and 0.03% Triton X-100  
461 with 2% human serum albumin) at 28 °C overnight. The grids were incubated on drops of goat  
462 anti-rabbit IgG conjugated to 10 nm colloidal gold particles (Nanoprobes Inc.) in 2% human serum  
463 albumin and 0.5% polyethylene glycol in 0.05 M TBS and 0.03% Triton X-100. The grids were  
464 then washed in TBS and counterstained for electron microscopy with 1% aqueous uranyl acetate  
465 followed by Reynolds's lead citrate. Ultrastructural analyses were performed in a JEOL-1010  
466 electron microscope.

467

## 468 **Hippocampal slice preparation**

469 Animal handling followed an approved protocol by the Albert Einstein College of Medicine  
470 Institutional Animal Care and Use Committee in accordance with National Institute of Health  
471 guidelines. Acute hippocampal slices (400  $\mu\text{m}$  thick) were obtained from Sprague-Dawley rats  
472 postnatal day 17 (P17) to P28 of either sex. The hippocampi were isolated and cut using a  
473 VT1200s microslicer (Leica Microsystems Co.) in a solution containing (in mM): 215 sucrose, 2.5  
474 KCl, 26  $\text{NaHCO}_3$ , 1.6  $\text{NaH}_2\text{PO}_4$ , 1  $\text{CaCl}_2$ , 4  $\text{MgCl}_2$ , 4  $\text{MgSO}_4$  and 20 glucose. Acute slices were  
475 placed in a chamber containing a 1:1 mix of sucrose cutting solution and extracellular artificial  
476 cerebrospinal fluid (ACSF) recording solution containing (in mM): 124 NaCl, 2.5 KCl, 26  $\text{NaHCO}_3$ ,  
477 1  $\text{NaH}_2\text{PO}_4$ , 2.5  $\text{CaCl}_2$ , 1.3  $\text{MgSO}_4$  and 10 glucose incubated in a warm-water bath at 33-34°C.  
478 The chamber was brought to room temperature for at least 15 min post-sectioning and the 1:1  
479 sucrose-ACSF solution was replaced by ACSF. All solutions were equilibrated with 95%  $\text{O}_2$  and  
480 5%  $\text{CO}_2$  (pH 7.4). Slices were allowed to recover for at least 45 min in the ACSF solution before  
481 recording.

482

## 483 **Electrophysiology**

484 Electrophysiology experiments were performed at  $26.0 \pm 0.1^\circ\text{C}$  in a submersion-type recording  
485 chamber perfused at 2 ml/min with ACSF supplemented with the GABA<sub>A</sub> receptor antagonist  
486 picrotoxin (100  $\mu\text{M}$ ) and the selective AMPA receptor (AMPA) antagonist LY303070 at a low  
487 concentration (0.5  $\mu\text{M}$ ) to minimize CA3-CA3 recurrent activity, or at a high concentration (15  $\mu\text{M}$ )  
488 to isolate KAR-EPSCs and KAR-EPSPs to assess monosynaptic mossy fiber transmission.  
489 Whole-cell recordings were made from CA3 pyramidal cells voltage clamped at -70 mV using  
490 patch-type pipette electrodes (3-4 m $\Omega$ ) containing (in mM): 131 cesium gluconate, 8 NaCl, 1  
491  $\text{CaCl}_2$ , 10 EGTA, 10 glucose, 10 HEPES, and 2 MK-801 pH 7.25 (280-285 mOsm) unless  
492 specified otherwise. KOH was used to adjust pH. Series resistance (8-15 M $\Omega$ ) was monitored  
493 throughout all experiments with a -5 mV, 80 ms voltage step, and cells that exhibited a series  
494 resistance change (>20%) were excluded from analysis. A stimulating bipolar electrode (theta  
495 glass, Warner Instruments) was filled with ACSF and placed in *stratum lucidum* to selectively  
496 activate mossy fibers using a DS2A Isolated Voltage Stimulator (Digitimer Ltd.) with a 100  $\mu\text{s}$   
497 pulse width duration. AMPAR-EPSCs were recorded for a baseline period of two minutes and  
498 low-frequency facilitation (LFF) was induced by stepping the stimulation frequency from 0.1 to 1  
499 Hz for two minutes. Facilitation was measured by taking a ratio of the mean EPSC during the  
500 steady-state, LFF period of activity and the two minute baseline ( $\text{EPSC}_{1\text{Hz}}/\text{EPSC}_{0.1\text{Hz}}$ ) before and  
501 after bath-application of NMDAR antagonists.

502

503 To qualify for analysis, mossy fiber responses met three criteria: 1) The 20-80% rise time of the  
504 AMPAR-EPSC was less than 1 ms 2) LFF was greater than 150% 3) The AMPAR-EPSC displayed  
505 at least 70% sensitivity to the group 2/3 mGluR agonist, DCG-IV (1  $\mu$ M). Isolated KAR-EPSCs  
506 were elicited by 2 pulses with a 5 ms inter-stimulus-interval for LFF experiments. Baseline  
507 measurements were acquired at least 10 min after “break-in” to achieve optimal intracellular  
508 blockade of postsynaptic NMDARs by MK-801 (2 mM) in the patch-pipette. To transect mossy  
509 fiber axons in acute slices, a 45° ophthalmic knife (Alcon Surgical) was used to make a diagonal  
510 cut across the hilus from the dorsal to ventral blades of the DG, and the subregion CA3b was  
511 targeted for patch-clamp recordings. For D-APV (2 mM) puff experiments, a puffer device (Toohey  
512 Company) was set to deliver 2-3 puffs of 100 ms duration at 3-4 psi during the two minutes of LFF  
513 activity. The puffer pipette was placed at least 300  $\mu$ m away from the recording site and both the  
514 puff pipette and hippocampal slice were positioned to follow the direction of the laminar flow in  
515 the low profile, submersion-type chamber (RC-26GLP, Warner Instruments). Burst-induced  
516 facilitation was elicited by 5 pulses at 25 Hz with a 0.03 Hz inter-trial-interval for a baseline period  
517 of 10 min. Facilitation was measured by taking a ratio of the mean KAR-EPSC peak of the 5<sup>th</sup>  
518 pulse to the 1<sup>st</sup> pulse ( $P_5/P_1$ ) before and after bath-application of MK-801 (50  $\mu$ M). To study KAR  
519 induced action potentials, CA3 pyramidal cells were patch-clamped with internal solution  
520 containing in (mM): 112 potassium gluconate, 17 KCl, 0.04 CaCl<sub>2</sub>, 0.1 EGTA, 10 HEPES, 10 NaCl,  
521 2 MgATP, 0.2 Na<sub>3</sub>GTP and 2 MK-801, pH 7.2 (280-285 mOsm). Current-clamped CA3 cells were  
522 held at -70 mV during burst stimulation of mossy fibers (5 pulses at 25 Hz) to monitor action  
523 potentials. Spike-transfer was measured by mean spikes/burst quantified for a 10 min period  
524 before and after bath application of MK-801 (50  $\mu$ M). Robust sensitivity to the AMPAR/KAR  
525 selective antagonist NBQX (10  $\mu$ M) confirmed KAR-EPSC responses. Both hilar mossy cells and  
526 CA3 interneurons were visually patched-loaded with Alexa 594 (35  $\mu$ M) and morphological identity  
527 was confirmed by two-photon imaging at the end of experiments. Hilar mossy cells were voltage  
528 clamped at -70 mV and a bipolar electrode was placed in the DG to activate mossy fibers. The  
529 data analysis and inclusion criteria used for mossy fiber experiments was also implemented for  
530 hilar mossy cell recordings. CA3 interneurons were voltage clamped at -70 mV and burst-  
531 stimulated, facilitation was assessed as previously mentioned. Both facilitating and depressing  
532 mossy fiber responses were included for analysis given the diversity of mossy fiber-CA3  
533 interneuron transmission (Toth et al., 2000). Whole-cell voltage and current clamp recordings  
534 were performed with an Axon MultiClamp 700B amplifier (Molecular Devices). Signals were

535 filtered at 2 kHz and digitized at 5 kHz. Stimulation and acquisition were controlled with custom  
536 software (Igor Pro 6).

537

### 538 **Transgenic animals**

539 *Grn1*-floxed littermate mice of either sex (P16-20) were injected with 1  $\mu$ l of AAV5-CamKII-eGFP,  
540 AAV5-CamKII-CreGFP, AAV5-CamKII-mcherry, or AAV5-CamKII-mcherry-Cre viruses at a rate  
541 of 0.12  $\mu$ l/min at coordinates ( $\pm$ 1.9 mm A/P,  $\pm$ 1.1 mm M/L,  $\pm$ 2.4 mm D/V) targeting the DG using  
542 a stereotaxic apparatus (Kopf Instruments). Two weeks post-surgery mice were sacrificed for  
543 electrophysiology or calcium imaging experiments. Mice were perfused with 20 ml of cold NMDG  
544 solution containing in (mM): 93 NMDG, 2.5 KCl, 1.25 NaH<sub>2</sub>PO<sub>4</sub>, 30 NaHCO<sub>3</sub>, 20 HEPES, 25  
545 glucose, 5 sodium ascorbate, 2 Thiourea, 3 sodium pyruvate, 10 MgCl<sub>2</sub>, 0.5 CaCl<sub>2</sub>, brought to pH  
546 7.35 with HCl. The hippocampi were isolated and cut using a VT1200s microslicer in cold NMDG  
547 solution. Acute mouse slices were placed in a chamber containing ACSF solution that was  
548 incubated in a warm water bath 33-34 °C. All solutions were equilibrated with 95% O<sub>2</sub> and 5%  
549 CO<sub>2</sub> (pH 7.4). Post-sectioning, slices were allowed to recover at room temperature for at least 45  
550 min prior to experiments. For NMDAR/AMPA ratios, GCs were patch-clamped with the cesium  
551 internal solution previously mentioned containing either Alexa 594 (35  $\mu$ M) for GFP+ cells (laser  
552 tuned to 830 nm/910 nm, respectively) or Alexa 488 (35  $\mu$ M) for mCherry+ cells (laser tuned to  
553 910 nm/780 nm, respectively). AMPAR-EPSCs were recorded at -65 mV in the presence of  
554 picrotoxin (100  $\mu$ M) by placing a bipolar electrode near the medial perforant path and delivering  
555 a 100  $\mu$ s pulse width duration using an Isoflex stimulating unit. AMPAR-EPSCs were acquired for  
556 at least 5 min followed by bath-application of NBQX (10  $\mu$ M) to isolate NMDAR-EPSCs. GCs were  
557 brought to +40 mV to alleviate magnesium block and record optimal NMDAR-EPSCs.  
558 NMDAR/AMPA ratios were measured by taking the mean NMDAR-EPSC/AMPA-EPSC for a  
559 5 min period of each component. Only acute mouse slices with optimal GFP and mCherry  
560 reporter fluorescence (i.e. robust expression) were used for electrophysiology and calcium  
561 imaging experiments. *Grin1*-floxed animals (The Jackson Laboratory) were kindly provided by  
562 Dr. Michael Higley (Yale University).

563

### 564 **Optogenetics**

565 *Grin1* floxed and control mice of either sexes (P17-20) were injected with a 1:2 mix of AAV5-  
566 CamKII-CreGFP/AAV-DJ-FLEX-ChiEF-tdTomato viruses targeting the DG. At least four weeks  
567 post-surgery acute hippocampal slices were prepared as previously described and slices showing  
568 optimal GFP and tdTomato expression were used for electrophysiology experiments. Mossy fiber

569 optical burst-stimulation was elicited by using a Coherent 473 nm laser (4-8 mW) delivering 5  
570 pulses at 25 Hz with a 1-2 ms pulse width duration. Facilitation was measured by taking a ratio  
571 of the mean AMPAR-EPSC peak of the 5<sup>th</sup> pulse to the 1<sup>st</sup> pulse ( $P_5/P_1$ ) in control and *Grin1*-cKO  
572 animals.

573

#### 574 **Two-photon calcium imaging and MNI-glutamate uncaging**

575 mCherry+ GCs were patch-loaded with an internal solution containing in (mM): 130 KMeSO<sub>4</sub>,  
576 HEPES, MgCl<sub>2</sub>, Na<sub>2</sub>ATP, NaGTP, phosphocreatine, .035 Alexa 594, and .2 Fluo-5F. GCs near  
577 the hilar border were avoided and GCs that exhibited adult-born GCs properties were excluded  
578 from analysis. The cells were kept in voltage clamp configuration at -50 mV for at least 1 hr to  
579 allow the diffusion of dyes to mossy fiber boutons in ACSF solution containing in (mM): 124 NaCl,  
580 2.5 KCl, 26 NaHCO<sub>3</sub>, 1 NaH<sub>2</sub>PO<sub>4</sub>, 4 CaCl<sub>2</sub>, 0 MgSO<sub>4</sub>, 10 glucose, 0.01 NBQX, 0.1 picrotoxin, and  
581 0.01 D-serine. Using an Ultima 2P microscope (Bruker Corp) with and Insight Deep See laser  
582 (Spectra Physics) tuned to 830 nm the "red" PMT was turned on and with minimal pockel power  
583 the red signal was used to identify the mossy fiber axon. With 512 x 512 pixel resolution mossy  
584 fiber axons were followed for at least 200 μm until bouton structures were morphologically  
585 identified and measured at least 3 μm in diameter. GCs were switched to current clamp mode  
586 held at -70 mV and 1 ms current injections were used to elicit a burst of 5 action potentials at 25  
587 Hz. Using line scan analysis software (PrairieView 5.4, Bruker Corp.) a line was drawn across  
588 the diameter of the bouton at a magnification of at least 16X. The "green" PMT channel was turned  
589 on and 1,000 lines were acquired in a 2 sec time period. Action potential induction was delayed  
590 for 400 ms to collect a baseline fluorescence time period. Calcium transients (CaTs) were  
591 acquired with a 1 min inter-trial-interval and analyzed using the  $\Delta G/R$  calculation. CaTs from  
592 control animals were compared to *Grin1*-cKO by taking the mean peak  $\Delta G/R$  value for a 30 ms  
593 period of the 5<sup>th</sup> action potential.

594

595 For uncaging experiments GCs that were mCherry+ were patch-loaded using the internal solution  
596 previously described in the presence of a 12 ml ACSF solution containing in (mM): 124 NaCl, 2.5  
597 KCl, 26 NaHCO<sub>3</sub>, 1 NaH<sub>2</sub>PO<sub>4</sub>, 4 CaCl<sub>2</sub>, 0 MgSO<sub>4</sub>, 10 glucose, 2.5 MNI-glutamate, 0.01 NBQX,  
598 0.1 picrotoxin, and 0.01 D-serine that was recirculated in a submersion type chamber. A MaiTai  
599 HP laser (Spectra Physics) was tuned to 720 nm to optimally uncage glutamate and elicit CaTs  
600 in GC spines. Following successful CaTs in GC spines, mossy fiber boutons were identified and  
601 to mimic bursting activity, 5 uncaging pulses (1 ms duration) were delivered at 25 Hz. The

602 acquired CaTs in spines and boutons were analyzed using the  $\Delta G/R$  calculation in control and  
603 *Grin1*-cKO animals.

604

### 605 **Two-photon BDNF-phluorin imaging**

606 *Grin1* floxed and control mice of both sexes (P16-20) were injected with a 1:2 mix of AAV5-  
607 CamKII-mCherryCre/AAV-DJ-DIO-BDNF-phluorin viruses targeting the DG. At least four weeks  
608 post-surgery acute hippocampal slices were prepared as previously described and slices showing  
609 optimal GFP and mCherry expression were taken for imaging sessions. Briefly, a stimulating  
610 monopolar micropipette electrode was placed in the *stratum lucidum* at least 250  $\mu\text{m}$  away from  
611 the imaging site. The Insight Deep See laser (Spectra Physics) was tuned to 880 nm and the  
612 imaging site was selected by the appearance of fibers and bouton structures in the *stratum*  
613 *lucidum*. Using 512 X 512 pixel resolution identified boutons measuring at least 3  $\mu\text{m}$  in diameter  
614 were selected as a region of interest (ROI) magnified to 4-6X and a baseline acquisition of 100  
615 consecutive images at 1 Hz using T-series software (PrairieView 5.4, Bruker Corp.) was acquired  
616 (Park et al., 2014). Following the baseline acquisition a burst-stimulation consisting of 125 pulses  
617 at 25 Hz was delivered 2x, triggering an acquisition of 200 consecutive images at 1 Hz. The  
618 fluorescence intensity of the bouton ROI was measured using ImageJ software to calculate  $\Delta F/F$   
619 of the BDNF-pHluorin signal. To verify reactivity of the ROI an isosmotic solution of  $\text{NH}_4\text{Cl}$  (50  
620 mM) was added at the end of the imaging session as previously reported (Park et al., 2014).

621

### 622 **Viruses**

623 AAV5-CamKII-eGFP and AAV5-CamKII-CreGFP viruses were acquired from UPenn Vector Core.  
624 AAV5-CamKII-mcherry and AAV5-CamKII-mcherry-Cre were obtained from UNC Chapel Hill  
625 Vector Core. The AAV-DJ-FLEX-Chief-tdTomato and AAV-DJ-DIO-BDNF-phluorin viruses were  
626 custom ordered and obtained from UNC Chapel Hill Vector Core. The DNA of the Chief virus  
627 was a generous gift from Dr. Pascal Kaeser (Harvard University), and the DNA of the BDNF-  
628 pHluorin was kindly provided by Dr. Hyungju Park (Korea Brain Research Institute).

629

### 630 **Chemicals & Drugs**

631 Picrotoxin and all chemicals used to prepare cutting, recording, and internal solutions were  
632 acquired from Sigma-Aldrich. All NMDAR antagonists (D-APV, MK-801, R-CPP), NMDAR agonist  
633 (D-serine), and the group 2/3 mGluR agonist (DCG-IV) were purchased from Tocris. D-APV was  
634 also acquired from the NIMH Chemical Synthesis Drug Program. NBQX was purchased from  
635 Cayman Chemical Company. The noncompetitive AMPAR selective antagonist LY303070 was

636 custom ordered from ABX Chemical Company. Alexa 594 morphological dye and the calcium  
637 indicator Fluo-5F were purchased from Thermo Scientific. For uncaging experiments MNI-  
638 glutamate was ordered from Tocris.

639

#### 640 **Statistical analysis and Data Acquisition**

641 All data points from experiments were tested for normality using a Shapiro-Wilk test where the p  
642 value was set to < 5% for a normal distribution. Experiments with a normal distribution and an N  
643 > to 7 cells were tested for statistical significance with a paired Student *t*-test with p value set to  
644 < 5%. Experiments with N < 7 cells or skewed distributions were tested for statistical significance  
645 using a paired Wilcoxon signed rank sum test with p value set to < 5%. For experiments  
646 comparing control and *Grin1*-cKO animals statistical significance was determined using Unpaired  
647 *t*-test and Mann-Whitney test with p values set to < 5% for normal distributions or rejected  
648 normality, respectively. All statistical tests were calculated using Origin Pro 9 (Origin Lab).  
649 Experimenters were blind to the identity of the virus injected in transgenic *Grin1* floxed mice during  
650 the acquisition of data in CA3 electrophysiology and two-photon imaging. However, data analysis  
651 could not be performed blind in those experiments in which NMDAR/AMPA ratios in GCs were  
652 examined in order to assess the efficiency of the cKO.

653

654

655

656 Acknowledgements: We thank current and former lab members for invaluable discussions, in  
657 particular Hannah Monday, Chiayu Chiu, Coralie Berthoux and Kaoutsar Nasrallah for critical  
658 evaluation of the manuscript. We also thank Dr. Hyungju Park for his generous gift of the BDNF-  
659 pHluorin DNA construct, Dr. Michael Higley for sharing *Grin1* floxed mice, and Dr. Pascal  
660 Kaeser for his generous gift of the Cre-dependent ChIEF DNA construct. This work supported  
661 by the NIH (F31-MH109267 to P.J.L.; R01-DA17392, R01 MH116673, R01MH125772, R01  
662 MH081935, and to P.E.C.) and by the Spanish Ministerio de Economía y Competitividad  
663 (RTI2018-095812-B-I00) and Junta de Comunidades de Castilla-La Mancha  
664 (SBPLY/17/180501/000229) to RL.

665

666

667 The authors declare no competing financial interests.

668

669

670 Author Contributions: P.J.L. and P.E.C. designed the experiments. P.J.L. performed experiments and  
671 analyzed data. H.B.K. performed preliminary experiments and made observations that triggered  
672 this study. R.L. performed EM experiments and analyzed the data. P.J.L. and P.E.C. wrote the first  
673 manuscript which was edited by all authors.

674

675

676

677  
678  
679  
680  
681  
682  
683  
684  
685  
686  
687  
688  
689  
690  
691  
692  
693  
694  
695  
696  
697  
698  
699  
700  
701  
702  
703  
704  
705  
706  
707  
708  
709  
710  
711  
712  
713  
714  
715  
716  
717  
718  
719  
720  
721  
722  
723  
724  
725  
726  
727

## REFERENCES

- Abbott, L. F., & Regehr, W. G. (2004). Synaptic computation. *Nature*, *431*(7010), 796-803. doi:10.1038/nature03010
- Abrahamsson, T., Chou, C. Y. C., Li, S. Y., Mancino, A., Costa, R. P., Brock, J. A., . . . Sjostrom, P. J. (2017). Differential Regulation of Evoked and Spontaneous Release by Presynaptic NMDA Receptors. *Neuron*, *96*(4), 839-855 e835. doi:10.1016/j.neuron.2017.09.030
- Alle, H., & Geiger, J. R. (2006). Combined analog and action potential coding in hippocampal mossy fibers. *Science*, *311*(5765), 1290-1293. doi:10.1126/science.1119055
- Amaral, D. G., & Dent, J. A. (1981). Development of the mossy fibers of the dentate gyrus: I. A light and electron microscopic study of the mossy fibers and their expansions. *J Comp Neurol*, *195*(1), 51-86. doi:10.1002/cne.901950106
- Amaral, D. G., Scharfman, H. E., & Lavenex, P. (2007). The dentate gyrus: fundamental neuroanatomical organization (dentate gyrus for dummies). *Prog Brain Res*, *163*, 3-22. doi:S0079-6123(07)63001-5 [pii] 10.1016/S0079-6123(07)63001-5
- Banerjee, A., Larsen, R. S., Philpot, B. D., & Paulsen, O. (2016). Roles of Presynaptic NMDA Receptors in Neurotransmission and Plasticity. *Trends Neurosci*, *39*(1), 26-39. doi:10.1016/j.tins.2015.11.001
- Berg, L. K., Larsson, M., Morland, C., & Gundersen, V. (2013). Pre- and postsynaptic localization of NMDA receptor subunits at hippocampal mossy fibre synapses. *Neuroscience*, *230*, 139-150. doi:10.1016/j.neuroscience.2012.10.061
- Berretta, N., & Jones, R. S. (1996). Tonic facilitation of glutamate release by presynaptic N-methyl-D-aspartate autoreceptors in the entorhinal cortex. *Neuroscience*, *75*(2), 339-344. doi:10.1016/0306-4522(96)00301-6
- Bischofberger, J., Engel, D., Frotscher, M., & Jonas, P. (2006). Timing and efficacy of transmitter release at mossy fiber synapses in the hippocampal network. *Pflugers Arch*, *453*(3), 361-372. doi:10.1007/s00424-006-0093-2
- Bouvier, G., Bidoret, C., Casado, M., & Paoletti, P. (2015). Presynaptic NMDA receptors: Roles and rules. *Neuroscience*, *311*, 322-340. doi:10.1016/j.neuroscience.2015.10.033
- Bouvier, G., Higgins, D., Spolidoro, M., Carrel, D., Mathieu, B., Lena, C., . . . Casado, M. (2016). Burst-Dependent Bidirectional Plasticity in the Cerebellum Is Driven by Presynaptic NMDA Receptors. *Cell Rep*, *15*(1), 104-116. doi:10.1016/j.celrep.2016.03.004
- Bouvier, G., Larsen, R. S., Rodriguez-Moreno, A., Paulsen, O., & Sjostrom, P. J. (2018). Towards resolving the presynaptic NMDA receptor debate. *Curr Opin Neurobiol*, *51*, 1-7. doi:10.1016/j.conb.2017.12.020
- Buchanan, K. A., Blackman, A. V., Moreau, A. W., Elgar, D., Costa, R. P., Lalanne, T., . . . Sjostrom, P. J. (2012). Target-specific expression of presynaptic NMDA receptors in neocortical microcircuits. *Neuron*, *75*(3), 451-466. doi:10.1016/j.neuron.2012.06.017
- Burke, K. J., Jr., & Bender, K. J. (2019). Modulation of Ion Channels in the Axon: Mechanisms and Function. *Front Cell Neurosci*, *13*, 221. doi:10.3389/fncel.2019.00221
- Carter, B. C., & Jahr, C. E. (2016). Postsynaptic, not presynaptic NMDA receptors are required for spike-timing-dependent LTD induction. *Nat Neurosci*, *19*(9), 1218-1224. doi:10.1038/nn.4343
- Castillo, P. E. (2012). Presynaptic LTP and LTD of excitatory and inhibitory synapses. *Cold Spring Harb Perspect Biol*, *4*(2). doi:10.1101/cshperspect.a005728
- Castillo, P. E., Malenka, R. C., & Nicoll, R. A. (1997). Kainate receptors mediate a slow postsynaptic current in hippocampal CA3 neurons. *Nature*, *388*(6638), 182-186. doi:10.1038/40645
- Chamberland, S., Timofeeva, Y., Evstratova, A., Volynski, K., & Toth, K. (2018). Action potential counting at giant mossy fiber terminals gates information transfer in the hippocampus. *Proc Natl Acad Sci U S A*, *115*(28), 7434-7439. doi:10.1073/pnas.1720659115



- 728 Chen, W., Walwyn, W., Ennes, H. S., Kim, H., McRoberts, J. A., & Marvizon, J. C. (2014). BDNF  
729 released during neuropathic pain potentiates NMDA receptors in primary afferent  
730 terminals. *Eur J Neurosci*, *39*(9), 1439-1454. doi:10.1111/ejn.12516
- 731 Chen, Y., Chen, S. R., Chen, H., Zhang, J., & Pan, H. L. (2019). Increased alpha2delta-1-NMDA  
732 receptor coupling potentiates glutamatergic input to spinal dorsal horn neurons in  
733 chemotherapy-induced neuropathic pain. *J Neurochem*, *148*(2), 252-274.  
734 doi:10.1111/jnc.14627
- 735 Christie, J. M., & Jahr, C. E. (2008). Dendritic NMDA receptors activate axonal calcium channels.  
736 *Neuron*, *60*(2), 298-307. doi:10.1016/j.neuron.2008.08.028
- 737 Christie, J. M., & Jahr, C. E. (2009). Selective expression of ligand-gated ion channels in L5  
738 pyramidal cell axons. *J Neurosci*, *29*(37), 11441-11450. doi:10.1523/JNEUROSCI.2387-  
739 09.2009
- 740 Conner, J. M., Lauterborn, J. C., Yan, Q., Gall, C. M., & Varon, S. (1997). Distribution of brain-  
741 derived neurotrophic factor (BDNF) protein and mRNA in the normal adult rat CNS:  
742 evidence for anterograde axonal transport. *J Neurosci*, *17*(7), 2295-2313.
- 743 Corlew, R., Brasier, D. J., Feldman, D. E., & Philpot, B. D. (2008). Presynaptic NMDA receptors:  
744 newly appreciated roles in cortical synaptic function and plasticity. *Neuroscientist*, *14*(6),  
745 609-625. doi:10.1177/1073858408322675
- 746 Corlew, R., Wang, Y., Ghermazien, H., Erisir, A., & Philpot, B. D. (2007). Developmental switch in  
747 the contribution of presynaptic and postsynaptic NMDA receptors to long-term depression.  
748 *J Neurosci*, *27*(37), 9835-9845. doi:10.1523/JNEUROSCI.5494-06.2007
- 749 Cull-Candy, S., Brickley, S., & Farrant, M. (2001). NMDA receptor subunits: diversity, development  
750 and disease. *Curr Opin Neurobiol*, *11*(3), 327-335.
- 751 Diamantaki, M., Frey, M., Berens, P., Preston-Ferrer, P., & Burgalossi, A. (2016). Sparse activity  
752 of identified dentate granule cells during spatial exploration. *Elife*, *5*.  
753 doi:10.7554/eLife.20252
- 754 Dore, K., Aow, J., & Malinow, R. (2016). The Emergence of NMDA Receptor Metabotropic  
755 Function: Insights from Imaging. *Front Synaptic Neurosci*, *8*, 20.  
756 doi:10.3389/fnsyn.2016.00020
- 757 Duguid, I. C. (2013). Presynaptic NMDA receptors: are they dendritic receptors in disguise? *Brain*  
758 *Res Bull*, *93*, 4-9. doi:10.1016/j.brainresbull.2012.12.004
- 759 Duguid, I. C., & Smart, T. G. (2009). Presynaptic NMDA Receptors. In A. M. Van Dongen (Ed.),  
760 *Biology of the NMDA Receptor*. Boca Raton (FL).
- 761 Engelman, H. S., & MacDermott, A. B. (2004). Presynaptic ionotropic receptors and control of  
762 transmitter release. *Nat Rev Neurosci*, *5*(2), 135-145. doi:10.1038/nrn1297
- 763 Evstratova, A., & Toth, K. (2014). Information processing and synaptic plasticity at hippocampal  
764 mossy fiber terminals. *Front Cell Neurosci*, *8*, 28. doi:10.3389/fncel.2014.00028
- 765 Fujisawa, S., & Aoki, C. (2003). In vivo blockade of N-methyl-D-aspartate receptors induces rapid  
766 trafficking of NR2B subunits away from synapses and out of spines and terminals in adult  
767 cortex. *Neuroscience*, *121*(1), 51-63. doi:10.1016/s0306-4522(03)00341-5
- 768 Gill, I., Droubi, S., Giovedi, S., Fedder, K. N., Bury, L. A., Bosco, F., . . . Sabo, S. L. (2015).  
769 Presynaptic NMDA receptors - dynamics and distribution in developing axons in vitro and  
770 in vivo. *J Cell Sci*, *128*(4), 768-780. doi:10.1242/jcs.162362
- 771 GoodSmith, D., Chen, X., Wang, C., Kim, S. H., Song, H., Burgalossi, A., . . . Knierim, J. J. (2017).  
772 Spatial Representations of Granule Cells and Mossy Cells of the Dentate Gyrus. *Neuron*,  
773 *93*(3), 677-690 e675. doi:10.1016/j.neuron.2016.12.026
- 774 Hagena, H., & Manahan-Vaughan, D. (2010). Frequency facilitation at mossy fiber-CA3 synapses  
775 of freely behaving rats contributes to the induction of persistent LTD via an adenosine-A1  
776 receptor-regulated mechanism. *Cereb Cortex*, *20*(5), 1121-1130.  
777 doi:10.1093/cercor/bhp184
- 778 Henze, D. A., Urban, N. N., & Barrionuevo, G. (2000). The multifarious hippocampal mossy fiber

- 779 pathway: a review. *Neuroscience*, 98(3), 407-427.
- 780 Henze, D. A., Wittner, L., & Buzsaki, G. (2002). Single granule cells reliably discharge targets in  
781 the hippocampal CA3 network in vivo. *Nat Neurosci*, 5(8), 790-795. doi:10.1038/nn887
- 782 Jackman, S. L., & Regehr, W. G. (2017). The Mechanisms and Functions of Synaptic Facilitation.  
783 *Neuron*, 94(3), 447-464. doi:10.1016/j.neuron.2017.02.047
- 784 Jourdain, P., Bergersen, L. H., Bhaukaurally, K., Bezzi, P., Santello, M., Domercq, M., . . . Volterra,  
785 A. (2007). Glutamate exocytosis from astrocytes controls synaptic strength. *Nat Neurosci*,  
786 10(3), 331-339. doi:10.1038/nn1849
- 787 Kamiya, H., Shinozaki, H., & Yamamoto, C. (1996). Activation of metabotropic glutamate receptor  
788 type 2/3 suppresses transmission at rat hippocampal mossy fibre synapses. *J Physiol*,  
789 493 ( Pt 2), 447-455. doi:10.1113/jphysiol.1996.sp021395
- 790 Klug, A., Borst, J. G., Carlson, B. A., Kopp-Scheinflug, C., Klyachko, V. A., & Xu-Friedman, M.  
791 A. (2012). How do short-term changes at synapses fine-tune information processing? *J*  
792 *Neurosci*, 32(41), 14058-14063. doi:10.1523/JNEUROSCI.3348-12.2012
- 793 Kunz, P. A., Roberts, A. C., & Philpot, B. D. (2013). Presynaptic NMDA receptor mechanisms for  
794 enhancing spontaneous neurotransmitter release. *J Neurosci*, 33(18), 7762-7769.  
795 doi:10.1523/JNEUROSCI.2482-12.2013
- 796 Kwon, H. B., & Castillo, P. E. (2008). Role of glutamate autoreceptors at hippocampal mossy fiber  
797 synapses. *Neuron*, 60(6), 1082-1094. doi:10.1016/j.neuron.2008.10.045
- 798 Larsen, R. S., Corlew, R. J., Henson, M. A., Roberts, A. C., Mishina, M., Watanabe, M., . . . Philpot,  
799 B. D. (2011). NR3A-containing NMDARs promote neurotransmitter release and spike  
800 timing-dependent plasticity. *Nat Neurosci*, 14(3), 338-344. doi:10.1038/nn.2750
- 801 Larsen, R. S., & Sjostrom, P. J. (2015). Synapse-type-specific plasticity in local circuits. *Curr Opin*  
802 *Neurobiol*, 35, 127-135. doi:10.1016/j.conb.2015.08.001
- 803 Larsen, R. S., Smith, I. T., Miriyala, J., Han, J. E., Corlew, R. J., Smith, S. L., & Philpot, B. D.  
804 (2014). Synapse-specific control of experience-dependent plasticity by presynaptic NMDA  
805 receptors. *Neuron*, 83(4), 879-893. doi:10.1016/j.neuron.2014.07.039
- 806 Lau, C. G., & Zukin, R. S. (2007). NMDA receptor trafficking in synaptic plasticity and  
807 neuropsychiatric disorders. *Nat Rev Neurosci*, 8(6), 413-426. doi:10.1038/nrn2153
- 808 Lawrence, J. J., & McBain, C. J. (2003). Interneuron diversity series: containing the detonation--  
809 feedforward inhibition in the CA3 hippocampus. *Trends Neurosci*, 26(11), 631-640.  
810 doi:10.1016/j.tins.2003.09.007
- 811 Lujan, R., Nusser, Z., Roberts, J. D., Shigemoto, R., & Somogyi, P. (1996). Perisynaptic location  
812 of metabotropic glutamate receptors mGluR1 and mGluR5 on dendrites and dendritic  
813 spines in the rat hippocampus. *Eur J Neurosci*, 8(7), 1488-1500.
- 814 Lysetskiy, M., Foldy, C., & Soltesz, I. (2005). Long- and short-term plasticity at mossy fiber  
815 synapses on mossy cells in the rat dentate gyrus. *Hippocampus*, 15(6), 691-696.  
816 doi:10.1002/hipo.20096
- 817 Madara, J. C., & Levine, E. S. (2008). Presynaptic and postsynaptic NMDA receptors mediate  
818 distinct effects of brain-derived neurotrophic factor on synaptic transmission. *J*  
819 *Neurophysiol*, 100(6), 3175-3184. doi:10.1152/jn.90880.2008
- 820 Mameli, M., Carta, M., Partridge, L. D., & Valenzuela, C. F. (2005). Neurosteroid-induced plasticity  
821 of immature synapses via retrograde modulation of presynaptic NMDA receptors. *J*  
822 *Neurosci*, 25(9), 2285-2294. doi:10.1523/JNEUROSCI.3877-04.2005
- 823 Martin, D., Bustos, G. A., Bowe, M. A., Bray, S. D., & Nadler, J. V. (1991). Autoreceptor regulation  
824 of glutamate and aspartate release from slices of the hippocampal CA1 area. *J*  
825 *Neurochem*, 56(5), 1647-1655. doi:10.1111/j.1471-4159.1991.tb02063.x
- 826 McGuinness, L., Taylor, C., Taylor, R. D., Yau, C., Langenhan, T., Hart, M. L., . . . Emptage, N. J.  
827 (2010). Presynaptic NMDARs in the hippocampus facilitate transmitter release at theta  
828 frequency. *Neuron*, 68(6), 1109-1127. doi:10.1016/j.neuron.2010.11.023
- 829 McHugh, T. J., Jones, M. W., Quinn, J. J., Balthasar, N., Coppari, R., Elmquist, J. K., . . .

- 830           Tonegawa, S. (2007). Dentate gyrus NMDA receptors mediate rapid pattern separation in  
831           the hippocampal network. *Science*, 317(5834), 94-99. doi:10.1126/science.1140263
- 832   McNamara, J. O., & Scharfman, H. E. (2012). Temporal Lobe Epilepsy and the BDNF Receptor,  
833           TrkB. In th, J. L. Noebels, M. Avoli, M. A. Rogawski, R. W. Olsen, & A. V. Delgado-Escueta  
834           (Eds.), *Jasper's Basic Mechanisms of the Epilepsies*. Bethesda (MD).
- 835   Miller, R. J. (1998). Presynaptic receptors. *Annu Rev Pharmacol Toxicol*, 38, 201-227.  
836           doi:10.1146/annurev.pharmtox.38.1.201
- 837   Nicoll, R. A., & Schmitz, D. (2005). Synaptic plasticity at hippocampal mossy fibre synapses. *Nat*  
838           *Rev Neurosci*, 6(11), 863-876. doi:10.1038/nrn1786
- 839   Nusser, Z., Lujan, R., Laube, G., Roberts, J. D., Molnar, E., & Somogyi, P. (1998). Cell type and  
840           pathway dependence of synaptic AMPA receptor number and variability in the  
841           hippocampus. *Neuron*, 21(3), 545-559.
- 842   Paoletti, P., Bellone, C., & Zhou, Q. (2013). NMDA receptor subunit diversity: impact on receptor  
843           properties, synaptic plasticity and disease. *Nat Rev Neurosci*, 14(6), 383-400.  
844           doi:10.1038/nrn3504
- 845   Park, H., Popescu, A., & Poo, M. M. (2014). Essential role of presynaptic NMDA receptors in  
846           activity-dependent BDNF secretion and corticostriatal LTP. *Neuron*, 84(5), 1009-1022.  
847           doi:10.1016/j.neuron.2014.10.045
- 848   Pernia-Andrade, A. J., & Jonas, P. (2014). Theta-gamma-modulated synaptic currents in  
849           hippocampal granule cells in vivo define a mechanism for network oscillations. *Neuron*,  
850           81(1), 140-152. doi:10.1016/j.neuron.2013.09.046
- 851   Petralia, R. S., Yokotani, N., & Wenthold, R. J. (1994). Light and electron microscope distribution  
852           of the NMDA receptor subunit NMDAR1 in the rat nervous system using a selective anti-  
853           peptide antibody. *J Neurosci*, 14(2), 667-696.
- 854   Pickel, V. M., Colago, E. E., Mania, I., Molosh, A. I., & Rainnie, D. G. (2006). Dopamine D1  
855           receptors co-distribute with N-methyl-D-aspartic acid type-1 subunits and modulate  
856           synaptically-evoked N-methyl-D-aspartic acid currents in rat basolateral amygdala.  
857           *Neuroscience*, 142(3), 671-690. doi:10.1016/j.neuroscience.2006.06.059
- 858   Pinheiro, P. S., & Mulle, C. (2008). Presynaptic glutamate receptors: physiological functions and  
859           mechanisms of action. *Nat Rev Neurosci*, 9(6), 423-436. doi:10.1038/nrn2379
- 860   Rebola, N., Carta, M., & Mulle, C. (2017). Operation and plasticity of hippocampal CA3 circuits:  
861           implications for memory encoding. *Nat Rev Neurosci*, 18(4), 208-220.  
862           doi:10.1038/nrn.2017.10
- 863   Rogers, M., & Dani, J. A. (1995). Comparison of quantitative calcium flux through NMDA, ATP,  
864           and ACh receptor channels. *Biophys J*, 68(2), 501-506. doi:10.1016/S0006-  
865           3495(95)80211-0
- 866   Rossi, B., Ogden, D., Llano, I., Tan, Y. P., Marty, A., & Collin, T. (2012). Current and calcium  
867           responses to local activation of axonal NMDA receptors in developing cerebellar molecular  
868           layer interneurons. *PLoS One*, 7(6), e39983. doi:10.1371/journal.pone.0039983
- 869   Salin, P. A., Scanziani, M., Malenka, R. C., & Nicoll, R. A. (1996). Distinct short-term plasticity at  
870           two excitatory synapses in the hippocampus. *Proc Natl Acad Sci U S A*, 93(23), 13304-  
871           13309.
- 872   Sanz-Clemente, A., Nicoll, R. A., & Roche, K. W. (2013). Diversity in NMDA receptor composition:  
873           many regulators, many consequences. *Neuroscientist*, 19(1), 62-75.  
874           doi:10.1177/1073858411435129
- 875   Savtchouk, I., Di Castro, M. A., Ali, R., Stubbe, H., Lujan, R., & Volterra, A. (2019). Circuit-specific  
876           control of the medial entorhinal inputs to the dentate gyrus by atypical presynaptic  
877           NMDARs activated by astrocytes. *Proc Natl Acad Sci U S A*, 116(27), 13602-13610.  
878           doi:10.1073/pnas.1816013116
- 879   Schicker, K. W., Dorostkar, M. M., & Boehm, S. (2008). Modulation of transmitter release via  
880           presynaptic ligand-gated ion channels. *Curr Mol Pharmacol*, 1(2), 106-129.

- 881 doi:10.2174/1874467210801020106  
882 Schildt, S., Endres, T., Lessmann, V., & Edelmann, E. (2013). Acute and chronic interference with  
883 BDNF/TrkB-signaling impair LTP selectively at mossy fiber synapses in the CA3 region of  
884 mouse hippocampus. *Neuropharmacology*, 71, 247-254.  
885 doi:10.1016/j.neuropharm.2013.03.041  
886 Senzai, Y., & Buzsaki, G. (2017). Physiological Properties and Behavioral Correlates of  
887 Hippocampal Granule Cells and Mossy Cells. *Neuron*, 93(3), 691-704 e695.  
888 doi:10.1016/j.neuron.2016.12.011  
889 Siegel, S. J., Brose, N., Janssen, W. G., Gasic, G. P., Jahn, R., Heinemann, S. F., & Morrison, J.  
890 H. (1994). Regional, cellular, and ultrastructural distribution of N-methyl-D-aspartate  
891 receptor subunit 1 in monkey hippocampus. *Proc Natl Acad Sci U S A*, 91(2), 564-568.  
892 Takumi, Y., Ramirez-Leon, V., Laake, P., Rinvik, E., & Ottersen, O. P. (1999). Different modes of  
893 expression of AMPA and NMDA receptors in hippocampal synapses. *Nat Neurosci*, 2(7),  
894 618-624. doi:10.1038/10172  
895 Toni, N., & Schinder, A. F. (2015). Maturation and Functional Integration of New Granule Cells into  
896 the Adult Hippocampus. *Cold Spring Harb Perspect Biol*, 8(1), a018903.  
897 doi:10.1101/cshperspect.a018903  
898 Toth, K., Soares, G., Lawrence, J. J., Philips-Tansey, E., & McBain, C. J. (2000). Differential  
899 mechanisms of transmission at three types of mossy fiber synapse. *J Neurosci*, 20(22),  
900 8279-8289.  
901 Traynelis, S. F., Wollmuth, L. P., McBain, C. J., Menniti, F. S., Vance, K. M., Ogden, K. K., . . .  
902 Dingledine, R. (2010). Glutamate receptor ion channels: structure, regulation, and  
903 function. *Pharmacol Rev*, 62(3), 405-496. doi:10.1124/pr.109.002451  
904 Vandael, D., Borges-Merjane, C., Zhang, X., & Jonas, P. (2020). Short-Term Plasticity at  
905 Hippocampal Mossy Fiber Synapses Is Induced by Natural Activity Patterns and  
906 Associated with Vesicle Pool Engram Formation. *Neuron*, 107(3), 509-521 e507.  
907 doi:10.1016/j.neuron.2020.05.013  
908 Vyleta, N. P., Borges-Merjane, C., & Jonas, P. (2016). Plasticity-dependent, full detonation at  
909 hippocampal mossy fiber-CA3 pyramidal neuron synapses. *Elife*, 5.  
910 doi:10.7554/eLife.17977  
911 Wang, P. Y., Petralia, R. S., Wang, Y. X., Wenthold, R. J., & Brenowitz, S. D. (2011). Functional  
912 NMDA receptors at axonal growth cones of young hippocampal neurons. *J Neurosci*,  
913 31(25), 9289-9297. doi:10.1523/JNEUROSCI.5639-10.2011  
914 Watanabe, M., Fukaya, M., Sakimura, K., Manabe, T., Mishina, M., & Inoue, Y. (1998). Selective  
915 scarcity of NMDA receptor channel subunits in the stratum lucidum (mossy fibre-recipient  
916 layer) of the mouse hippocampal CA3 subfield. *Eur J Neurosci*, 10(2), 478-487.  
917 Wong, H. H., Rannio, S., Jones, V., Thomazeau, A., & Sjostrom, P. J. (2020). NMDA receptors in  
918 axons: there's no coincidence. *J Physiol*. doi:10.1113/JP280059  
919 Woodhall, G., Evans, D. I., Cunningham, M. O., & Jones, R. S. (2001). NR2B-containing NMDA  
920 autoreceptors at synapses on entorhinal cortical neurons. *J Neurophysiol*, 86(4), 1644-  
921 1651. doi:10.1152/jn.2001.86.4.1644  
922 Yan, Q., Rosenfeld, R. D., Matheson, C. R., Hawkins, N., Lopez, O. T., Bennett, L., & Welcher, A.  
923 A. (1997). Expression of brain-derived neurotrophic factor protein in the adult rat central  
924 nervous system. *Neuroscience*, 78(2), 431-448.  
925 Yang, J., Woodhall, G. L., & Jones, R. S. (2006). Tonic facilitation of glutamate release by  
926 presynaptic NR2B-containing NMDA receptors is increased in the entorhinal cortex of  
927 chronically epileptic rats. *J Neurosci*, 26(2), 406-410. doi:10.1523/JNEUROSCI.4413-  
928 05.2006  
929 Zeng, J., Thomson, L. M., Aicher, S. A., & Terman, G. W. (2006). Primary afferent NMDA receptors  
930 increase dorsal horn excitation and mediate opiate tolerance in neonatal rats. *J Neurosci*,  
931 26(46), 12033-12042. doi:10.1523/JNEUROSCI.2530-06.2006

932 Zucca, S., Griguoli, M., Malezieux, M., Grosjean, N., Carta, M., & Mulle, C. (2017). Control of  
933 Spike Transfer at Hippocampal Mossy Fiber Synapses In Vivo by GABAA and GABAB  
934 Receptor-Mediated Inhibition. *J Neurosci*, 37(3), 587-598.  
935 doi:10.1523/JNEUROSCI.2057-16.2016  
936

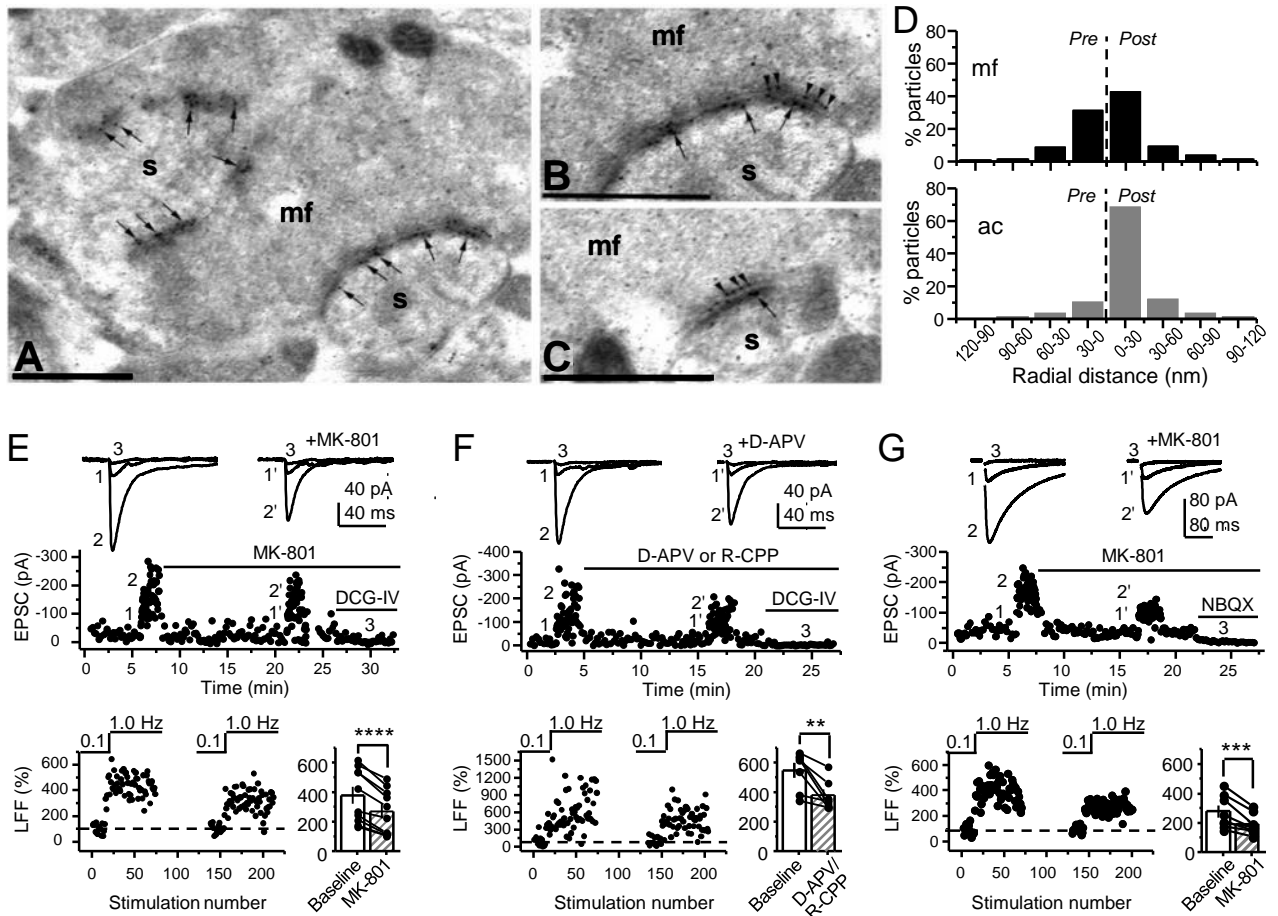

**Figure 1. Anatomical and functional evidence for preNMDARs at mossy fiber synapses.** (A) Image of a mossy fiber (mf) giant bouton and postsynaptic spines (s). (B, C) Higher magnification of mossy fiber synapses. Arrows indicate postsynaptic GluN1 whereas arrowheads indicate presynaptic GluN1. Calibration bars: 500 nm. (D) Mossy fiber (mf) and associational commissural (ac) synaptic GluN1 immuno-particle radial distribution (30 nm bins), mf: 34 synapses, 100 presynaptic particles; ac: 25 synapses, 24 presynaptic particles; 3 animals. (E) AMPAR-EPSCs were recorded at  $V_h = -70$  mV in the presence of  $0.5 \mu\text{M}$  LY303070 and  $100 \mu\text{M}$  picrotoxin. Low-frequency facilitation (LFF), induced by stepping stimulation frequency from 0.1 to 1 Hz, was assessed before and after bath application of MK-801 ( $50 \mu\text{M}$ ). MK-801 significantly reduced LFF (baseline  $378 \pm 57\%$ , MK-801  $270 \pm 48\%$ ,  $n = 10$  cells; baseline vs MK-801,  $p = 3.8 \times 10^{-5}$ , paired  $t$ -test). In all panels of this figure: representative traces (top), representative experiment (middle), normalized LFF and summary plot (bottom). DCG-IV ( $1 \mu\text{M}$ ) was applied at the end of all recordings to confirm mf-CA3 transmission. (F) D-APV or R-CPP ( $50$ - $100 \mu\text{M}$ ) application also reduced LFF (baseline  $546 \pm 50\%$ , D-APV/R-CPP  $380 \pm 38\%$ ,  $n = 7$  cells; baseline vs D-APV/R-CPP,  $p = 0.00743$ , paired  $t$ -test). (G) KAR-EPSCs were recorded at  $V_h = -70$  mV in the presence of  $15 \mu\text{M}$  LY303070 and  $100 \mu\text{M}$  picrotoxin. In addition, NMDAR-mediated transmission was blocked intracellularly by loading MK-801 ( $2$  mM) in the patch-pipette. Bath application of MK-801 ( $50 \mu\text{M}$ ) significantly reduced LFF (baseline  $278 \pm 40\%$ , MK-801  $195 \pm 26\%$ ,  $n = 8$  cells; baseline vs MK-801,  $p = 0.00259$ , paired  $t$ -test). Data are presented as mean  $\pm$  s.e.m. \*\*  $p < 0.01$ ; \*\*\*  $p < 0.005$ ; \*\*\*\*  $p < 0.001$ .

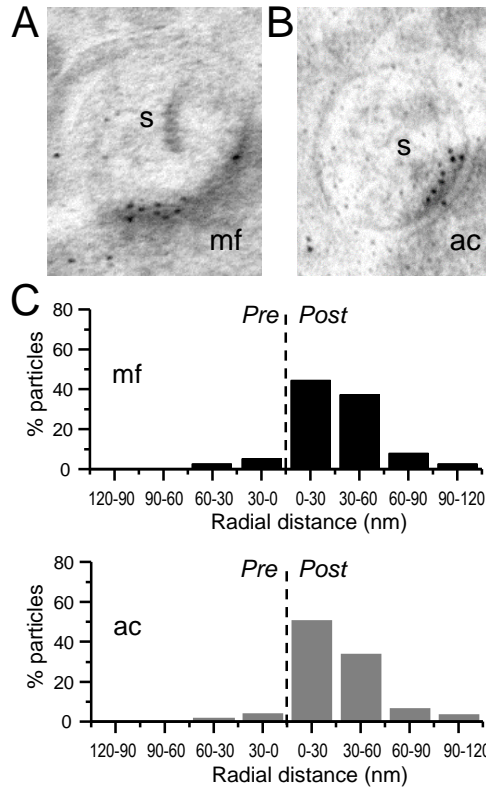

**Supplementary Figure 1 related to Figure 1.** Immunogold-EM reveals negligible presynaptic AMPAR particle distribution. **(A,B)** Images of mossy fiber (mf) and associational commissural (ac) synapses, postsynaptic spines (s). **(C)** AMPAR immuno-particle distribution (30 nm bins), mf: 102 synapses, 8 presynaptic particles; ac: 75 synapses, 6 presynaptic particles; 3 animals. Dashed line represents synaptic cleft.

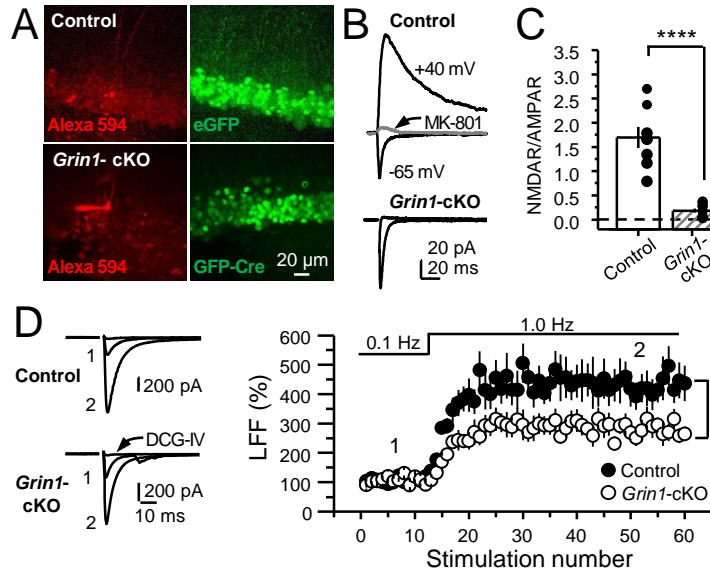

**Figure 2. GluN1 deletion from granule cells reduces mf-CA3 facilitation.** (A) Representative images showing GCs patch-loaded with Alexa 594 (35  $\mu$ M) (left), and GFP expression in GCs (right). (B) Representative EPSCs recorded from control (GFP<sup>+</sup>) and *Grin1-cKO* (Cre-GFP<sup>+</sup>) GCs. Synaptic responses were elicited by activating medial perforant-path inputs. AMPAR-EPSCs were recorded at  $V_h = -65$  mV in the presence of 100  $\mu$ M picrotoxin, NMDAR-EPSCs were isolated with 10  $\mu$ M NBQX and recorded at +40 mV. MK-801 (20  $\mu$ M) was applied at the end of each recording. (C) Summary plot demonstrating that GluN1 deletion from GCs virtually abolished NMDAR-mediated transmission indicated by a strong reduction of NMDAR/AMPA in *Grin1-cKO* GCs as compared to controls (control  $1.61 \pm 0.18$ ,  $n = 9$  cells, *Grin1-cKO*  $0.18 \pm 0.04$ ,  $n = 10$  cells; control vs *Grin1-cKO*,  $p = 9.2 \times 10^{-6}$ , unpaired  $t$ -test). (D) LFF was significantly reduced in GluN1-deficient animals (control,  $430 \pm 5\%$ ,  $n = 13$  cells; *Grin1-cKO*,  $291 \pm 6\%$ ,  $n = 11$  cells;  $p = 0.0239$ , unpaired  $t$ -test). Representative traces (left) and summary plot (right). LFF was induced by stepping stimulation frequency from 0.1 to 1 Hz. DCG-IV (1  $\mu$ M) was added at the end of each experiment. Data are presented as mean  $\pm$  s.e.m. \*  $p < 0.05$ ; \*\*\*\*  $p < 0.001$



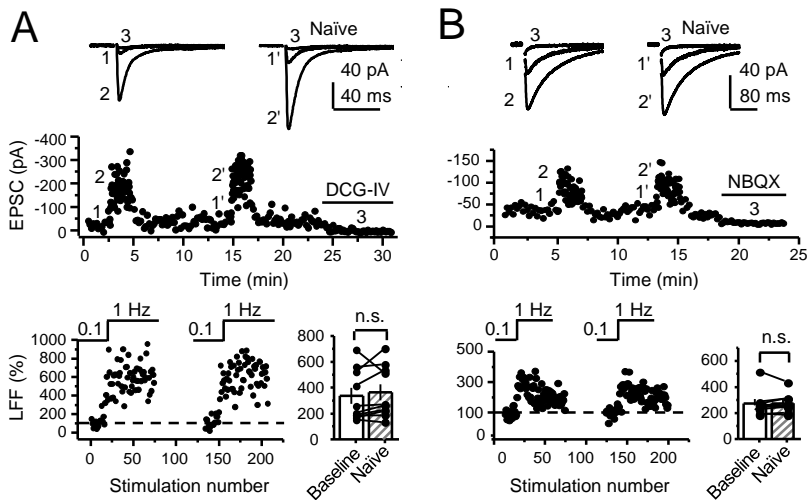

**Supplementary Figure 2** related to **Figure 1**. **(A)** Stable low-frequency facilitation (LFF) of AMPAR-EPSCs. In naïve slices (interleaved experiments), LFF remained unchanged throughout the recording session (baseline  $335 \pm 62\%$ , naïve  $363 \pm 63\%$ ,  $n = 10$  cells,  $p = 0.185$ , Wilcoxon-Signed Ranks test baseline vs naïve). DCG-IV ( $1 \mu\text{M}$ ) was applied at the end of all recordings to confirm mf-CA3 transmission. **(B)** LFF of KAR-EPSCs was also stable in interleaved, naïve slices (baseline  $274 \pm 33\%$ , naïve  $278 \pm 25\%$ ,  $n = 9$  cells;  $p = 0.236$ , Wilcoxon Signed Ranks test, baseline vs naïve). NBQX ( $10 \mu\text{M}$ ) was applied at the end of all recordings to confirm mossy fiber KAR transmission. Data are presented as mean  $\pm$  s.e.m.

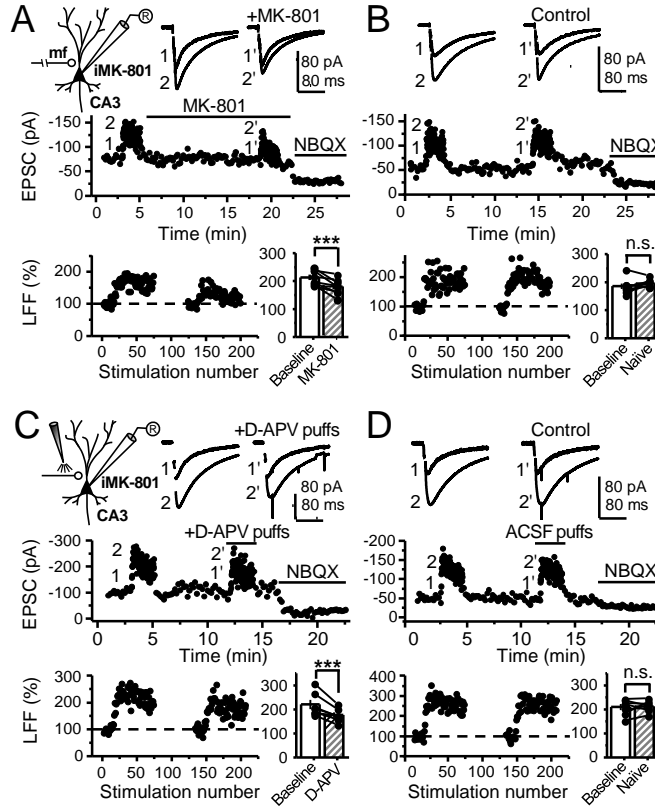

**Figure 3. Reduced facilitation by NMDAR antagonism is independent of the GC somatodendritic compartment.** (A) KAR-EPSCs were recorded at  $V_h = -70$  mV in the presence of  $15 \mu\text{M}$  LY303070 and  $100 \mu\text{M}$  picrotoxin. In addition, NMDAR-mediated transmission was blocked intracellularly by loading MK-801 ( $2 \text{ mM}$ ) in the patch-pipette. LFF of KAR-EPSCs was assessed as in Fig. 1G but with transected mossy fiber axons (see Methods). Bath application of MK-801 ( $50 \mu\text{M}$ ) significantly reduced LFF (baseline  $213 \pm 9\%$ , MK-801  $181 \pm 10\%$ ,  $n = 8$  cells; baseline vs MK-801,  $p = 0.002$ , paired  $t$ -test). In all panels of this figure: recording arrangement (*inset*), representative traces (*top*), representative experiment (*middle*), normalized LFF and summary plot (*bottom*). (B) Stable LFF in transected, naïve slices (baseline  $186 \pm 10\%$ , naïve  $196 \pm 5\%$ ,  $n = 8$  cells, baseline vs naïve,  $p = 0.278$ , paired  $t$ -test). (C) LFF was induced before and during puff application of D-APV ( $2 \text{ mM}$ ) in *stratum lucidum*. This manipulation significantly reduced facilitation (baseline  $220 \pm 19\%$ , D-APV puff  $176 \pm 11\%$ ,  $n = 7$  cells; baseline vs D-APV puff,  $p = 0.003$ , paired  $t$ -test). (D) Stable LFF in acute slices during puff application of ACSF (baseline  $210\% \pm 12$ , naïve  $213\% \pm 9$ ,  $n = 7$  cells; baseline vs naïve,  $p = 0.778$ , paired  $t$ -test). NBQX ( $10 \mu\text{M}$ ) was applied at the end of all recordings to confirm mossy fiber KAR transmission. Data are presented as mean  $\pm$  s.e.m. \*\*\*  $p < 0.005$ .

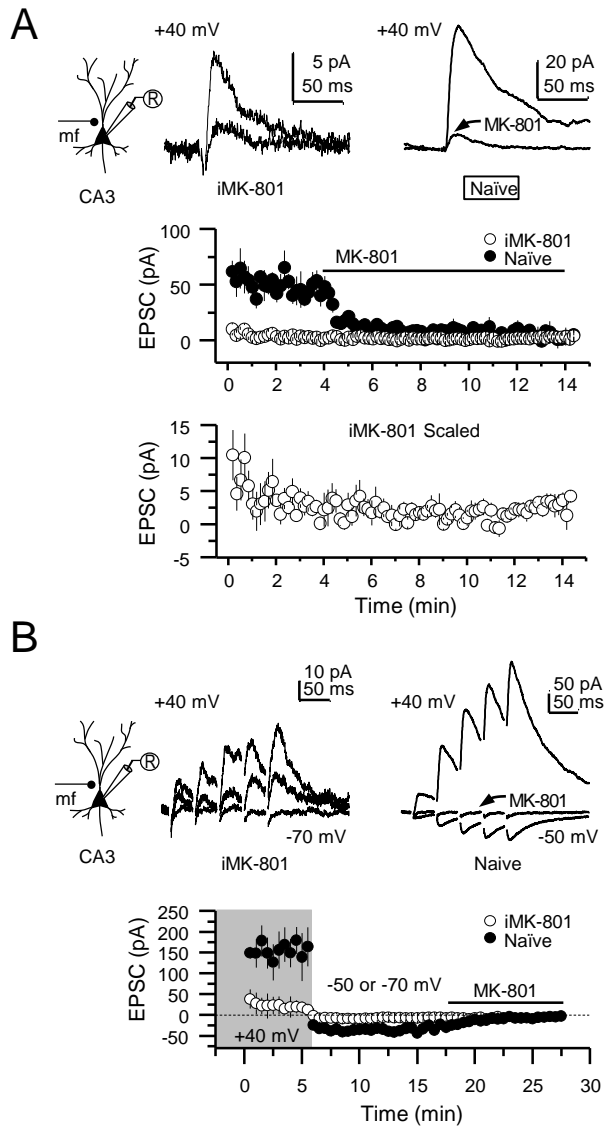

**Supplementary Figure 3 related to Figures 1 & 4.** Intracellular MK-801 effectively blocked postsynaptic NMDARs. In each panel of this figure, representative NMDAR-EPSCs from CA3 pyramidal neurons patch-loaded with 2 mM MK-801 (*left*) or naïve internal solution (*right*). Mossy fiber inputs were stimulated with a bipolar electrode (theta-glass pipette) in *stratum lucidum* delivering 1 pulse or 5 pulses at 25 Hz in the presence of PTX (100  $\mu$ M) and NBQX (10  $\mu$ M). **(A)** NMDAR currents were recorded at  $V_h = +40$  mV in intracellular MK-801 (iMK-801) and naïve conditions. Bath-application of MK-801 (50  $\mu$ M) blocked NMDAR currents in naïve cells to a similar magnitude as cells patch-loaded with MK-801 ( $n = 5$  cells in each condition,  $U = 0.0122$ , Mann-Whitney test). Note that CA3 pyramidal neurons were loaded for at least 3-5 minutes before recording started at +40 mV. **(B)** NMDAR currents were recorded at  $V_h = +40$  mV (*gray shaded area*) followed by a voltage jump to -70 mV in iMK-801 conditions and -50 mV in naïve recordings. Bath-application of MK-801 (50  $\mu$ M) blocked NMDAR currents of the 5<sup>th</sup> pulse to a similar magnitude as iMK-801 ( $n = 5$  cells per condition,  $U = 0.008$ , Mann-Whitney test). Data are presented as mean  $\pm$  s.e.m.

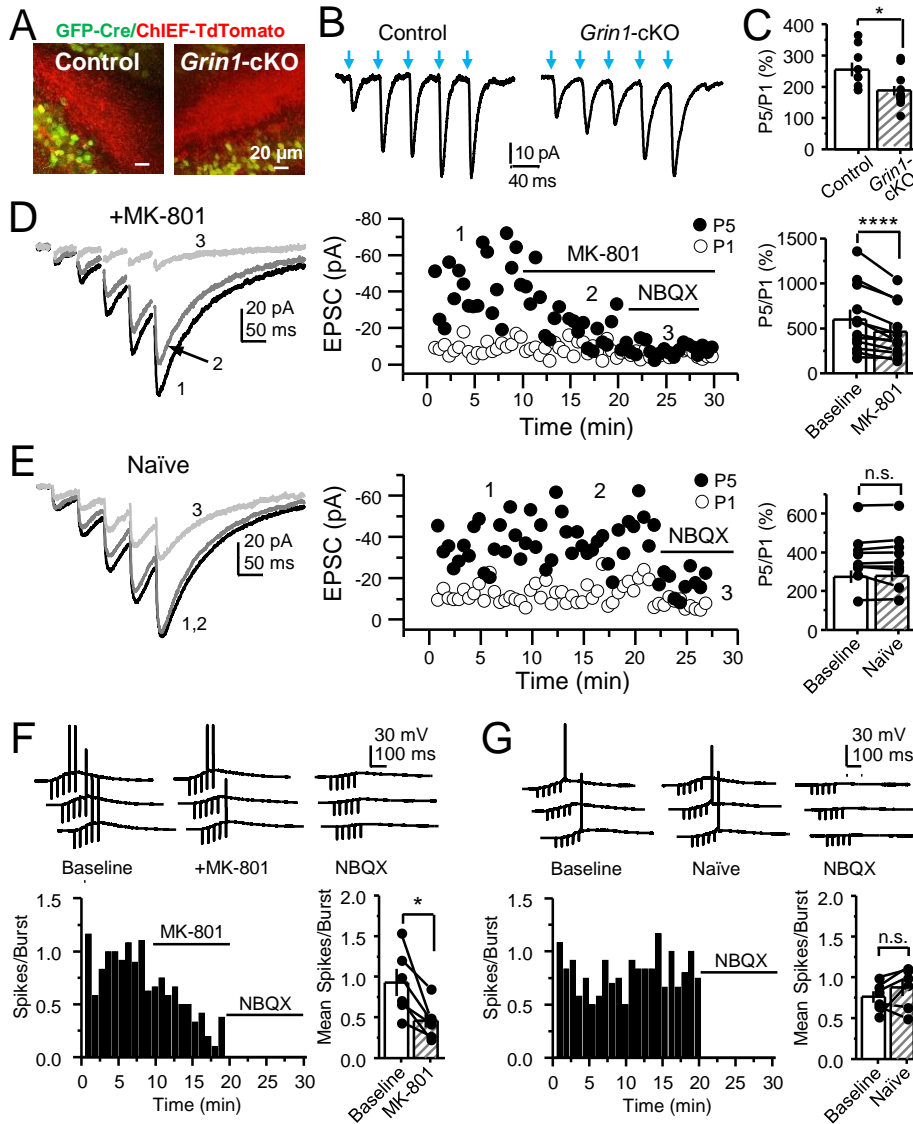

**Figure 4. PreNMDARs contribute significantly to burst-induced facilitation and spike transfer.** (A) Representative images showing expression of GFP-Cre (*left*) and ChIEF-tdTomato (*right*) in the DG of control and *Grin1-cKO* animals. (B) Representative AMPAR-EPSCs from control (*left*) and *Grin1-cKO* (*right*) CA3 pyramidal neurons recorded at  $V_h = -65$  mV and evoked by optical burst-stimulation (5 pulses at 25 Hz) of *stratum lucidum*. Blue arrows indicate light stimulation. (C) Summary plot of burst-induced facilitation measured as P5/P1 ratio of optical responses; facilitation was significantly reduced in *Grin1-cKO* animals as compared to control (*Grin1-cKO*  $187 \pm 16\%$ ,  $n = 12$  cells, control  $255 \pm 22\%$ ,  $n = 9$  cells; *Grin1-cKO* vs control,  $p = 0.0167$ , unpaired *t*-test). (D) Burst-stimulation induced KAR-EPSCs that were isolated and recorded as described in Fig. 3, bath-application of MK-801 ( $50 \mu\text{M}$ ) significantly reduced facilitation (baseline  $601 \pm 107\%$ , MK-801  $464 \pm 84\%$ ,  $n = 13$  cells; baseline vs MK-801,  $p = 0.00042$ , paired *t*-test). In panels D and E of this figure: representative traces (*left*), representative experiment (*middle*), and summary plot (*right*). (E) Burst-induced facilitation was stable in interleaved, naïve slices (baseline  $369 \pm 45\%$ , naïve  $367 \pm 48\%$ ,  $n = 9$  cells,  $p = 0.863$ , paired *t*-test). (F) Bath-application of MK-801 ( $50 \mu\text{M}$ ) reduced KAR-mediated action potentials induced by burst-stimulation (baseline  $0.93 \pm 0.17$ , MK-801  $0.46 \pm 0.09$ ,  $n = 6$  cells,  $p = 0.036$ , Wilcoxon Signed Ranks test). In panels F and G of this figure: representative traces (*top*), representative experiment and summary plot (*bottom*). (G) Stable KAR-mediated action potentials in interleaved naïve slices (baseline  $0.76 \pm 0.07$ , naïve  $0.88 \pm 0.1$ ,  $n = 6$  cells,  $p = 0.2084$ , Wilcoxon Signed Ranks test). NBQX ( $10 \mu\text{M}$ ) was applied at the end of all experiments in panels D-G. Data are presented as mean  $\pm$  s.e.m. \*  $p < 0.05$ ; \*\*\*\*  $p < 0.001$

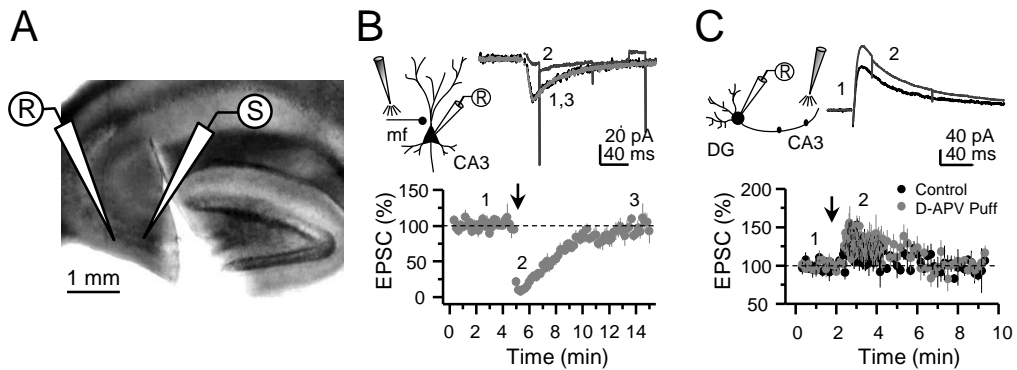

**Supplementary Figure 4 related to Figure 3.** Targeting preNMDARs in mf axons but not granule cells. **(A)** Field view of a representative hippocampal slice showing a surgical cut between DG and CA3. **(B)** Local D-APV puff application (vertical arrow, 2 puffs at 0.1 Hz) blocks NMDAR currents recorded at  $V_h = -50$  mV and washes out in less than 10 minutes ( $n = 7$  cells,  $p = 5 \times 10^{-8}$ , paired  $t$ -test). Inset depicts the recording paradigm of the experiment (*left*), the representative NMDAR currents (*top*) and the summary time course (*bottom*) where arrows denote the onset of D-APV (2 mM) puff application. Mossy fibers were stimulated with a bipolar electrode (theta-glass pipette) in *stratum lucidum* in the presence of 100  $\mu$ M PTX and 10  $\mu$ M NBQX. **(C)** D-APV puff application in CA3 did not reduce NMDAR transmission in GCs ( $n = 6$  cells, control vs D-APV puff,  $U = 0.594$ , Mann-Whitney test). Excitatory inputs were stimulated with a monopolar electrode placed in the medial molecular layer, in the presence of 100  $\mu$ M PTX and 10  $\mu$ M NBQX, and while GCs were clamped at  $V_h = +40$  mV. Data are presented as mean  $\pm$  s.e.m.

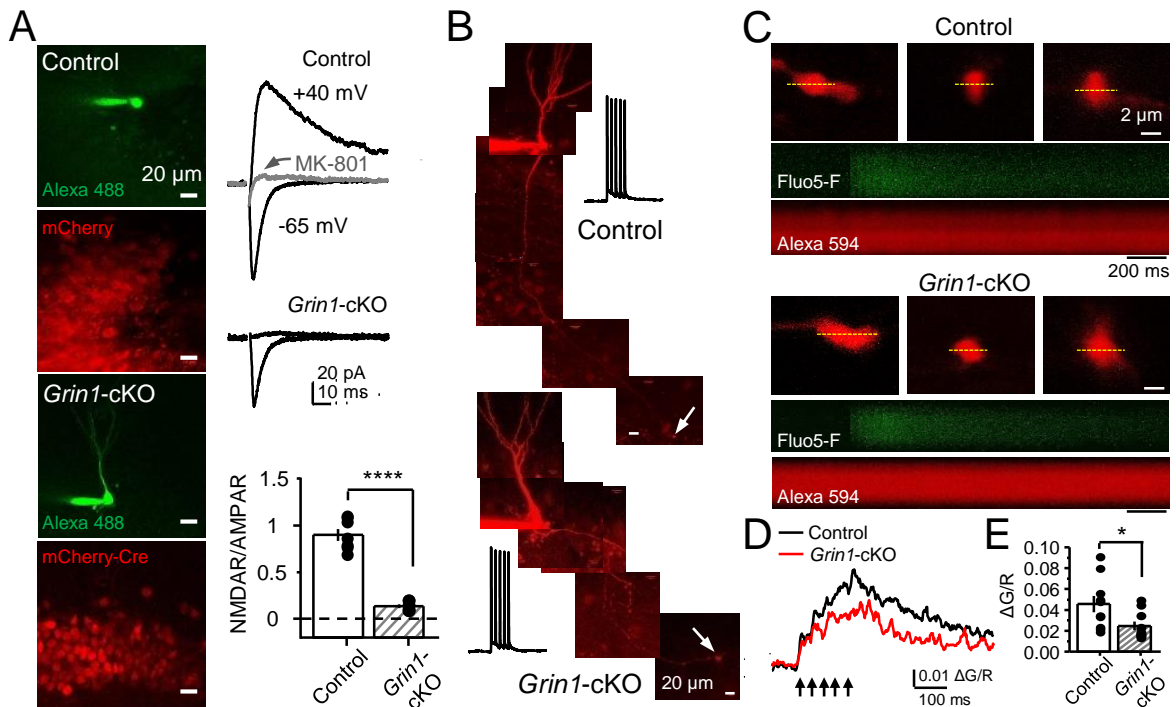

**Figure 5. preNMDARs contribute to presynaptic  $\text{Ca}^{2+}$  rise.** (A) Representative images showing GCs patch-loaded with Alexa 488 (35  $\mu$ M) to confirm expression of mCherry (bottom). Representative EPSCs recorded from control (top) or *Grin1*-cKO (middle) GCs. Synaptic responses were elicited by activating medial perforant-path inputs. AMPAR-EPSCs were recorded at  $V_h = -65$  mV in the presence of 100  $\mu$ M PTX, NMDAR-EPSCs were isolated with 10  $\mu$ M NBQX and recorded at +40 mV. MK-801 (20  $\mu$ M) was applied at the end of each experiment. Summary plot (bottom) demonstrating that GluN1 deletion from granule cells virtually abolished NMDAR-mediated transmission indicated by a strong reduction of NMDAR/AMPA in *Grin1*-cKO granule cells as compared to controls (control  $0.90 \pm 0.17$ ,  $n = 7$  cells, *Grin1*-cKO  $0.13 \pm 0.05$ ,  $n = 6$  cells; control vs *Grin1*-cKO,  $p = 3.81 \times 10^{-7}$ , unpaired *t*-test). (B) Representative control and *Grin1*-cKO granule cells patch-loaded with Fluo-5F (200  $\mu$ M) and Alexa 594 (35  $\mu$ M). Arrows indicate the identification of a mossy fiber giant bouton. (C) Three representative mossy fiber boutons (top) and line scan analysis of calcium transients (CaTs) elicited by action potential stimulation of 5 APs at 25 Hz (bottom), in Control and *Grin1*-cKO animals. Dotted line (yellow) indicates line scan. Red Channel, Alexa 594; Green Channel, Fluo5-F. (D, E) Peak analysis of the 5<sup>th</sup> pulse  $\Delta$ G/R revealed a significant reduction in calcium rise of *Grin1*-cKO animals as compared to Control (control  $0.046 \pm 0.01$ ,  $n = 10$  boutons, *Grin1*-cKO  $0.025 \pm 0.004$ ,  $n = 10$  boutons; control vs. *Grin1*-cKO,  $U = 0.017$ , Mann-Whitney test). Arrows indicate mossy fiber activation. Data are presented as mean  $\pm$  s.e.m. \*  $U < 0.05$ ; \*\*\*\*  $p < 0.001$

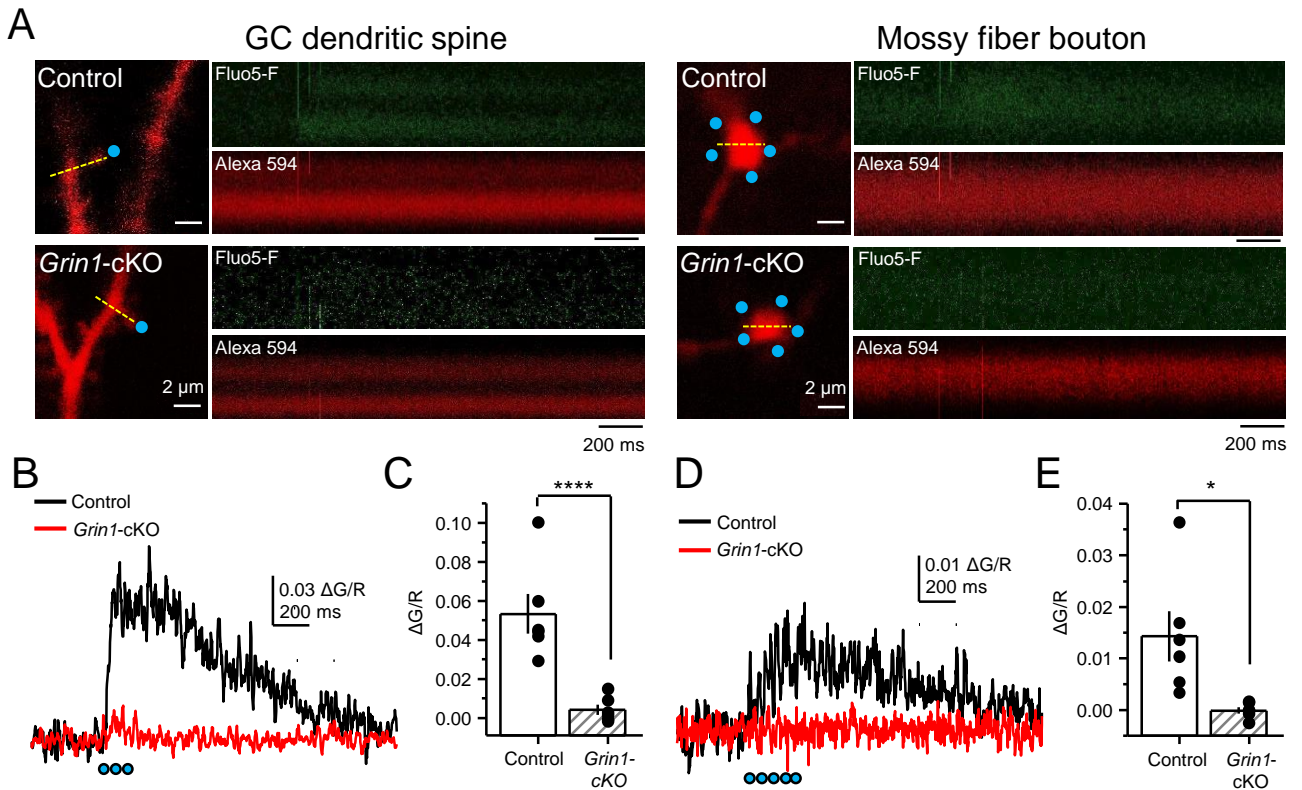

**Figure 6. Uncaging glutamate induces  $Ca^{2+}$  rise mossy fiber boutons.** (A) Representative images showing dendritic spines in GCs (*left*) and mossy fiber boutons (*right*), and the associated line scan analysis of calcium transients (CaTs) elicited by uncaging of MNI-glutamate (see Methods), in control and *Grin1-cKO* animals. Blue dots indicate uncaging spots. Red Channel, Alexa 594; Green Channel, Fluo5-F. (B) Line scan analysis of CaTs measuring  $\Delta G/R$  in dendritic spines when MNI-glutamate is uncaged in control or *Grin1-cKO* animals. Blue dots indicate 2PU pulses. (C) Summary plot demonstrating a significant reduction in dendritic spine CaTs in *Grin1-cKO* as compared to Control (control  $0.053 \pm 0.01 \Delta G/R$ ,  $n = 6$  dendritic spines, *Grin1-cKO*  $0.004 \pm 0.003 \Delta G/R$ ,  $n = 6$  spines;  $\Delta G/R$  control vs. *Grin1-cKO*,  $p = 0.00088$ , unpaired *t*-test). (D) Line scan analysis of CaTs measuring  $\Delta G/R$  in mossy fiber boutons when MNI-glutamate is uncaged in control or *Grin1-cKO* animals. (E) Summary plot demonstrating significant CaTs in boutons of control as compared to *Grin1-cKO* (control  $0.014 \pm 0.005$ ,  $n = 6$  boutons, *Grin1-cKO*  $-0.00012 \pm -0.0006$ ,  $n = 6$  boutons; control vs. *Grin1-cKO*,  $p = 0.015$ , unpaired *t*-test). Data are presented as mean  $\pm$  s.e.m. \*  $p < 0.05$ ; \*\*\*\*  $p < 0.001$ .

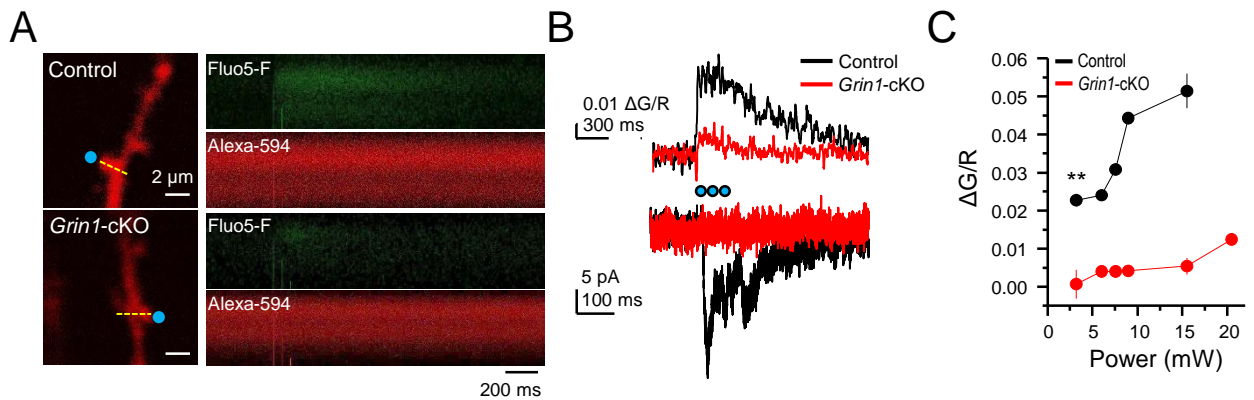

**Supplementary Figure 5 related to Figure 6.** *Grin1*-cKO exhibit reduced CaTs at varying uncaging laser power intensities. **(A)** Representative images of CaTs from control (*top*) and *Grin1*-cKO animals (*bottom*) after MNI-glutamate uncaging (2 mM, 3 pulses at 25 Hz) on GC dendritic spines. Dotted line (yellow) indicates line scan, and blue dots indicate uncaging spots. **(B)** Quantified  $\Delta$ G/R signals (*top*) and uncaging induced NMDAR-EPSCs (*bottom*) from control and *Grin1*-cKO animals. Blue dots indicate 2PU pulses **(C)** Control animals display robust  $\Delta$ G/R signals as compared to *Grin1*-cKO animals at varying laser power intensities (6 spines per group,  $U = 0.00507$  per power intensity, Mann-Whitney test). Data are presented as mean  $\pm$  s.e.m. \*\*  $U < 0.01$ .



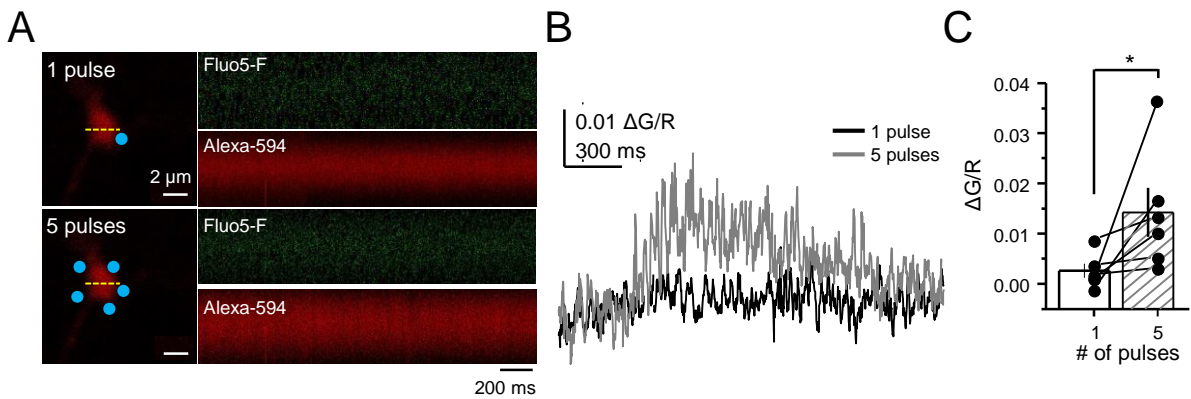

**Supplementary Figure 6 related to Figure 6.** Bouton CaTs can be detected after repetitive uncaging of MNI-glutamate. **(A)** Representative images of CaTs from single-trial: 1 pulse (*top*) and 5 pulses, 25 Hz (*bottom*) of MNI-glutamate uncaging (2 mM). Dotted line (yellow) indicates line scan, and blue dots indicate uncaging spots. **(B)** Quantified  $\Delta$ G/R signals from 1 pulse (*black*) and 5 pulses (*dark gray*) from all trials. **(C)** Repetitive pulses display robust  $\Delta$ G/R signals as compared to single pulses ( $n = 6$  boutons,  $p = 0.03603$ , Wilcoxon-Signed Ranks test). Data are presented as mean  $\pm$  s.e.m. \*  $p < 0.05$ .

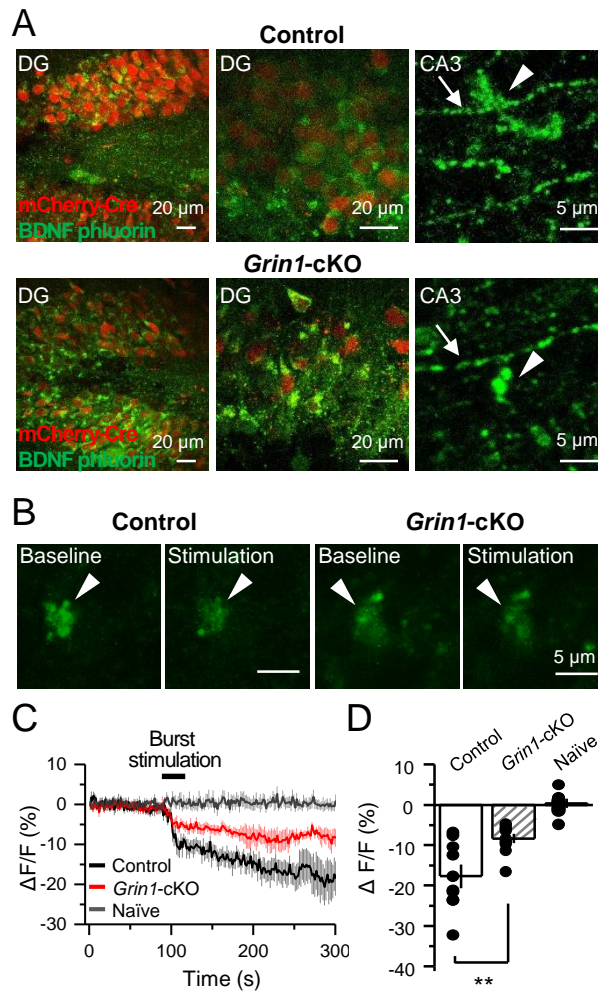

**Figure 7. preNMDARs contribute significantly to BDNF release following repetitive activity.** (A) Representative images showing expression of BDNF-pHluorin in the DG and CA3 area (arrows indicate mossy fiber axon, arrowheads indicate mossy fiber boutons). Control images (top), *Grin1-cKO* images (bottom). (B) Representative images of BDNF-pHluorin signal intensity at baseline and after repetitive stimulation of mossy fibers (125 pulses, 25 Hz, x 2). Control images (left), *Grin1-cKO* images (right), arrowhead indicates region of interest. (C) Time course of BDNF-pHluorin signal intensity measured as  $\Delta F/F$  (%): control (black), *Grin1-cKO* (red), Naïve (gray). (D) Quantification of BDNF-pHluorin signal in (C) during the last 100 seconds reveals larger BDNF release in control animals as compared to *Grin1-cKO* (control  $-18\% \pm 3\%$ ,  $n = 12$  slices, *Grin1-cKO*  $-8 \pm 1\%$ ,  $n = 10$  slices, *Grin1-cKO* vs. control,  $p = 0.00648$ , unpaired  $t$ -test). Data are presented as mean  $\pm$  s.e.m. \*\*  $p < 0.01$ .

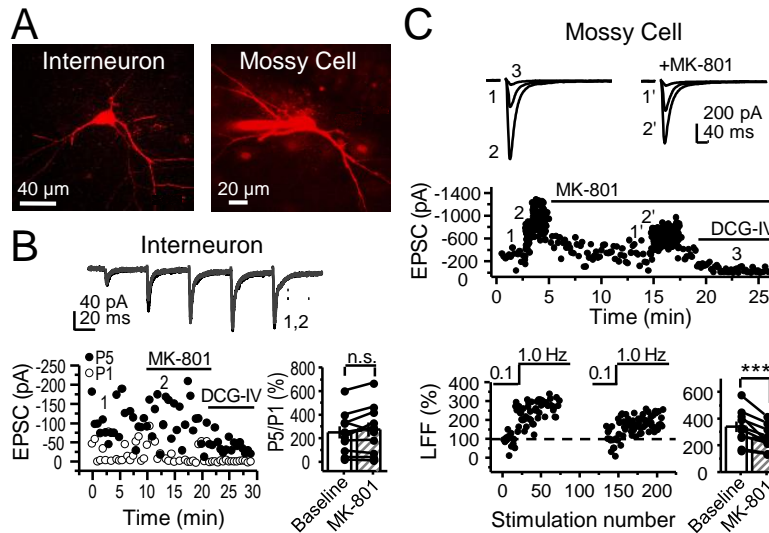

**Figure 8. preNMDARs contribute to synaptic facilitation of mossy fiber inputs onto mossy cells but not inhibitory interneurons.** (A) Representative images showing a CA3 interneuron and a hilar mossy cell patch-loaded with Alexa 594 (35  $\mu\text{M}$ ) for morphological identification in acute slices. (B) AMPAR-EPSCs were recorded from CA3 interneurons at  $V_h = -65$  mV and burst-stimulation was elicited by 5 pulses at 25 Hz, see traces (top). Representative experiment (bottom, left), and summary plot (bottom, right) showing bath-application of MK-801 (50  $\mu\text{M}$ ) had no significant effect on facilitation measured by P5/P1 ratio (Baseline:  $248 \pm 51\%$ ; MK-801:  $275 \pm 60\%$ ,  $n = 11$ , MK-801 vs baseline,  $p = 0.1411$ , paired  $t$ -test). (C) AMPAR-ESPCs were recorded at  $V_h = -70$  mV from hilar mossy cells, LFF was induced by stepping stimulation frequency from 0.1 to 1 Hz, see traces (top). Representative experiment (middle), normalized LFF and summary plot (bottom) indicating bath-application of MK-801 (50  $\mu\text{M}$ ) reduced facilitation (baseline  $350 \pm 10\%$ , MK-801  $225 \pm 25\%$ ,  $n = 9$  cells; baseline vs MK-801,  $p = 0.00152$ , paired  $t$ -test). DCG-IV (1  $\mu\text{M}$ ) was applied at the end of all experiments. Data are presented as mean  $\pm$  s.e.m. \*\*\*  $p < 0.005$ .

| Figure | Normality Test (Shapiro-Wilk)                  | Test used                  | N                                                    | P value                       |
|--------|------------------------------------------------|----------------------------|------------------------------------------------------|-------------------------------|
| 1D     |                                                |                            | 3 animals                                            |                               |
| 1E     | passed                                         | paired <i>t</i> -test      | 10 cells                                             | $p < 0.001$ $p = 0.000038$    |
| 1F     | passed                                         | paired <i>t</i> -test      | 7 cells                                              | $p < 0.01$ $p = 0.00743$      |
| 1G     | passed                                         | paired <i>t</i> -test      | 8 cells                                              | $p < 0.005$ $p = 0.00259$     |
| S1C    |                                                |                            | 3 animals                                            |                               |
| 2C     | Control: passed<br><i>Grin1</i> -cKO: passed   | unpaired <i>t</i> -test    | Control: 9 cells<br><i>Grin1</i> -cKO: 10 cells      | $p < 0.001$ $p = 0.0000092$   |
| 2D     | Control: passed<br><i>Grin1</i> -cKO: passed   | unpaired <i>t</i> -test    | Control: 13 cells<br><i>Grin1</i> -cKO: 11 cells     | $p < 0.05$ $p = 0.0239$       |
| S2A    | rejected                                       | Wilcoxon Signed Ranks test | 10 cells                                             | $p > 0.1$ $p = 0.185$         |
| S2B    | rejected                                       | Wilcoxon Signed Ranks test | 9 cells                                              | $p > 0.1$ $p = 0.236$         |
| 3A     | passed                                         | paired <i>t</i> -test      | 8 cells                                              | $p < 0.005$ $p = 0.002$       |
| 3B     | passed                                         | paired <i>t</i> -test      | 8 cells                                              | $p > 0.1$ $p = 0.278$         |
| 3C     | passed                                         | paired <i>t</i> -test      | 7 cells                                              | $p < 0.005$ $p = 0.003$       |
| 3D     | passed                                         | paired <i>t</i> -test      | 7 cells                                              | $p > 0.1$ $p = 0.778$         |
| S3A    | Naïve: passed<br>iMK-801: passed               | Mann-Whitney test          | Naïve: 5 cells<br>iMK-801: 5 cells                   | $U = 0.0122$                  |
| S3B    | Naïve: passed<br>iMK-801: passed               | Mann-Whitney test          | Naïve: 5 cells<br>iMK-801: 5 cells                   | $U = 0.008$                   |
| 4C     | Control: passed<br><i>Grin1</i> -cKO: passed   | unpaired <i>t</i> -test    | Control: 9 cells<br><i>Grin1</i> -cKO: 12 cells      | $p < 0.05$ $p = 0.0167$       |
| 4D     | passed                                         | paired <i>t</i> -test      | 13 cells                                             | $p < 0.001$ $p = 0.00042$     |
| 4E     | passed                                         | paired <i>t</i> -test      | 9 cells                                              | $p > 0.5$ $p = 0.863$         |
| 4F     | passed                                         | Wilcoxon Signed Ranks test | 6 cells                                              | $p < 0.05$ $p = 0.036$        |
| 4G     | passed                                         | Wilcoxon Signed Ranks test | 6 cells                                              | $p > 0.2$ $p = 0.2084$        |
| S4B    | passed                                         | paired <i>t</i> -test      | 7 cells                                              | $p < 0.001$ $p = 0.00000005$  |
| S4C    | passed                                         | Mann-Whitney test          | 6 cells                                              | $U = 0.594$                   |
| 5A     | Control: passed<br><i>Grin1</i> -cKO: passed   | unpaired <i>t</i> -test    | Control: 7 cells<br><i>Grin1</i> -cKO: 6 cells       | $p < 0.001$ $p = 0.000000381$ |
| 5E     | Control: passed<br><i>Grin1</i> -cKO: rejected | Mann-Whitney test          | Control: 10 boutons<br><i>Grin1</i> -cKO: 10 boutons | $U = 0.017$                   |
| 6C     | Control: passed<br><i>Grin1</i> -cKO: passed   | unpaired <i>t</i> -test    | Control: 6 spines<br><i>Grin1</i> -cKO: 6 spines     | $p < 0.001$ $p = 0.00088$     |

|     |                                                |                            |                                                    |                           |
|-----|------------------------------------------------|----------------------------|----------------------------------------------------|---------------------------|
| 6E  | Control: passed<br><i>Grin1</i> -cKO: passed   | unpaired <i>t</i> -test    | Control: 6 boutons<br><i>Grin1</i> -cKO: 6 boutons | $p < 0.05$ $p = 0.015$    |
| S5C | Control: passed<br><i>Grin1</i> -cKO: rejected | Mann-Whitney test          | Control: 6 spines<br><i>Grin1</i> -cKO: 6 spines   | $U = 0.00507$             |
| S6C | 1 pulse: passed<br>5 pulses: passed            | Wilcoxon Signed Ranks test | 1 pulse: 6 boutons<br>5 pulses: 6 boutons          | $p < 0.05$ $p = 0.03603$  |
| 7D  | Control: passed<br><i>Grin1</i> -cKO: passed   | unpaired <i>t</i> -test    | Control: 12 slices<br><i>Grin1</i> -cKO: 10 slices | $p < 0.01$ $p = 0.00648$  |
| 8B  | passed                                         | paired <i>t</i> -test      | 11 cells                                           | $p > 0.1$ $p = 0.1411$    |
| 8C  | passed                                         | paired <i>t</i> -test      | 10 cells                                           | $p < 0.005$ $p = 0.00152$ |
